# Supplementary material
Source: PubMed Central journal article supplement (PMC9767453)
Supplement: mmc1.pdf [file mmc1.pdf]

# THE LANCET

## Gastroenterology & Hepatology

### Supplementary appendix

This appendix formed part of the original submission and has been peer reviewed.  
We post it as supplied by the authors.

Supplement to: de Jonge L, Worthington J, van Wifferen F, et al. Impact of the COVID-19 pandemic on faecal immunochemical test-based colorectal cancer screening programmes in Australia, Canada, and the Netherlands: a comparative modelling study. *Lancet Gastroenterol Hepatol* 2021; published online Feb 3. [https://doi.org/10.1016/S2468-1253\(21\)00003-0](https://doi.org/10.1016/S2468-1253(21)00003-0).

## Supplementary materials

### Contents

|                                                                                                           |    |
|-----------------------------------------------------------------------------------------------------------|----|
| 1. Supplementary Methods .....                                                                            | 2  |
| 1. Tables .....                                                                                           | 2  |
| Table S1 Overview of model assumptions and characteristics of the simulated screening programs. ....      | 2  |
| Table S2 Overview of additional disruption scenarios .....                                                | 4  |
| 2. Supplementary Results.....                                                                             | 5  |
| 1. Tables .....                                                                                           | 5  |
| Table S3 Outcomes for disruption scenarios vs the comparator for the MISCAN-Colon model. ....             | 5  |
| Table S4 Outcomes for disruption scenarios vs the comparator for the ASCCA model. ....                    | 6  |
| Table S5 Outcomes for disruption scenarios vs the comparator for the Policy1-Bowel model. ....            | 7  |
| Table S6 Outcomes for disruption scenarios vs the comparator for the OncoSim model. ....                  | 8  |
| Table S7 Outcomes for additional disruption scenarios vs the comparator for the MISCAN-Colon model. ....  | 9  |
| Table S8 Outcomes for additional disruption scenarios vs the comparator for the ASCCA model. ....         | 10 |
| Table S9 Outcomes for additional disruption scenarios vs the comparator for the Policy1-Bowel model. .... | 11 |
| Table S10 Outcomes for additional disruption scenarios vs the comparator for the OncoSim model. ....      | 12 |
| References .....                                                                                          | 13 |

## 1. Supplementary Methods

### 1. Tables

**Table S1 Overview of model assumptions and characteristics of the simulated screening programs.**

|                                                                    | MISCAN-Colon                                                                                                                                                                               | ASCCA                                                                                                                                                                                      | Policy1-Bowel                                                                                                                                                                   | OncoSim                                                                                                                                                                |
|--------------------------------------------------------------------|--------------------------------------------------------------------------------------------------------------------------------------------------------------------------------------------|--------------------------------------------------------------------------------------------------------------------------------------------------------------------------------------------|---------------------------------------------------------------------------------------------------------------------------------------------------------------------------------|------------------------------------------------------------------------------------------------------------------------------------------------------------------------|
| <b>General model platform</b>                                      |                                                                                                                                                                                            |                                                                                                                                                                                            |                                                                                                                                                                                 |                                                                                                                                                                        |
| Model type                                                         | Microsimulation model                                                                                                                                                                      | Microsimulation model                                                                                                                                                                      | Microsimulation model                                                                                                                                                           | Microsimulation model                                                                                                                                                  |
| Simulation time step                                               | Continuous time                                                                                                                                                                            | Annual                                                                                                                                                                                     | Annual                                                                                                                                                                          | Annual                                                                                                                                                                 |
| Minimum age of a simulated individual, years                       | 0                                                                                                                                                                                          | 20                                                                                                                                                                                         | 20                                                                                                                                                                              | 15                                                                                                                                                                     |
| Maximum age of a simulated individual, years                       | 100                                                                                                                                                                                        | 90                                                                                                                                                                                         | 100                                                                                                                                                                             | 100                                                                                                                                                                    |
| <b>Natural history assumptions</b>                                 |                                                                                                                                                                                            |                                                                                                                                                                                            |                                                                                                                                                                                 |                                                                                                                                                                        |
| CRC development pathway                                            | All CRC develops through the adenoma-carcinoma pathway                                                                                                                                     | Assumes 85% of CRC develops via the adenoma-carcinoma pathway and the remaining 15% develops via the serrated pathway                                                                      | Assumes 85% of CRC develops via the adenoma-carcinoma pathway and the remaining 15% develops via the serrated pathway                                                           | All CRC develops through the adenoma-carcinoma pathway                                                                                                                 |
| <b>Screening and diagnostic-follow-up assumptions</b>              |                                                                                                                                                                                            |                                                                                                                                                                                            |                                                                                                                                                                                 |                                                                                                                                                                        |
| Modelled country/area                                              | The Netherlands                                                                                                                                                                            | The Netherlands                                                                                                                                                                            | Australia                                                                                                                                                                       | Canada                                                                                                                                                                 |
| Screening test                                                     | FIT (FOB gold, cut-off 47 µg Hb/g feces)                                                                                                                                                   | FIT (FOB gold, cut-off 47 µg Hb/g feces)                                                                                                                                                   | FIT (Magstream HemSp, cut-off 20 µg Hb/g feces)                                                                                                                                 | FIT (Polymedco and Alfresa Pharma, cut-off 20 µg Hb/g feces)                                                                                                           |
| <i>Screening test characteristics (per person)</i>                 |                                                                                                                                                                                            |                                                                                                                                                                                            |                                                                                                                                                                                 |                                                                                                                                                                        |
| Specificity, %                                                     | 93.8%; 97.6% <sup>a, b</sup>                                                                                                                                                               | 96.0%; 97.3% <sup>a, e</sup>                                                                                                                                                               | 94.8% <sup>f</sup>                                                                                                                                                              | 96.0%                                                                                                                                                                  |
| Sensitivity for adenoma 1-5 mm, %                                  | 0.0%; 0.0% <sup>a, b</sup>                                                                                                                                                                 | 0.3%; 0.4% <sup>a, e</sup>                                                                                                                                                                 | 15.2%                                                                                                                                                                           | 4.0%                                                                                                                                                                   |
| Sensitivity for adenoma 6-9 mm, %                                  | 11.7%; 52.0% <sup>a, b</sup>                                                                                                                                                               | 6.1%; 21.3% <sup>a, e</sup>                                                                                                                                                                | 30.2%                                                                                                                                                                           | 10.0%                                                                                                                                                                  |
| Sensitivity for adenoma ≥ 10 mm, %                                 | 47.5%; 94.6% <sup>a, b</sup>                                                                                                                                                               | 31.7%; 38.9% <sup>a, e</sup>                                                                                                                                                               | 41.5%                                                                                                                                                                           | 30.0%                                                                                                                                                                  |
| Sensitivity for CRC, %                                             | 30.3%; 30.4% <sup>a, b, c, d</sup><br>66.6%; 66.2% <sup>a, b, c, d</sup>                                                                                                                   | 50% <sup>c, d</sup><br>85% <sup>c, d</sup>                                                                                                                                                 | 58.6%                                                                                                                                                                           | 75.0%                                                                                                                                                                  |
| Screening interval                                                 | Biennial                                                                                                                                                                                   | Biennial                                                                                                                                                                                   | Biennial                                                                                                                                                                        | Biennial                                                                                                                                                               |
| Screening age range, years                                         | 55-75 years                                                                                                                                                                                | 55-75 years                                                                                                                                                                                | 50-74 years                                                                                                                                                                     | 50-74 years                                                                                                                                                            |
| Screening program history prior to 2020 included in the simulation | The model incorporates the phased implementation of the Dutch CRC Screening Program in 2014–19 and the fully implemented biennial FIT screening program for 55–75 years from 2020 onwards. | The model incorporates the phased implementation of the Dutch CRC Screening Program in 2014–19 and the fully implemented biennial FIT screening program for 55–75 years from 2020 onwards. | The model incorporates the phased implementation of the Australian NBCSP in 2006–19 and the fully implemented biennial FIT screening program for 50–74 years from 2020 onwards. | Screening programs were introduced at different time points across Canada. The simulated scenario assumed that CRC screening program was introduced in Canada in 2008. |

|                                                                   |                                                                                                                                                                                                                                                                                                                                                                                                       |                                                                                                                                                                                                                                                                                                                                                                                                       |                                                                                                                                                                                                                                                                                                                                                                                                                                                                                                                                                                                                                                                                                                         |                                                                                                                                                                        |
|-------------------------------------------------------------------|-------------------------------------------------------------------------------------------------------------------------------------------------------------------------------------------------------------------------------------------------------------------------------------------------------------------------------------------------------------------------------------------------------|-------------------------------------------------------------------------------------------------------------------------------------------------------------------------------------------------------------------------------------------------------------------------------------------------------------------------------------------------------------------------------------------------------|---------------------------------------------------------------------------------------------------------------------------------------------------------------------------------------------------------------------------------------------------------------------------------------------------------------------------------------------------------------------------------------------------------------------------------------------------------------------------------------------------------------------------------------------------------------------------------------------------------------------------------------------------------------------------------------------------------|------------------------------------------------------------------------------------------------------------------------------------------------------------------------|
| Screening participation rate, %                                   | ~73%                                                                                                                                                                                                                                                                                                                                                                                                  | ~73%                                                                                                                                                                                                                                                                                                                                                                                                  | ~41%                                                                                                                                                                                                                                                                                                                                                                                                                                                                                                                                                                                                                                                                                                    | 42.3%                                                                                                                                                                  |
| 1 <sup>st</sup> round                                             | ~73% participation rate when individuals receive their 1 <sup>st</sup> screening invitation, with the rate varying by age. Of those who did not take part at prior invitation, the participation rate at the next invitation round was assumed to be ~17%, rate vary by age. The assumptions were based on participation rates observed in the Dutch CRC screening program in 2014-2019. <sup>1</sup> | ~73% participation rate when individuals receive their 1 <sup>st</sup> screening invitation, with the rate varying by age. Of those who did not take part at prior invitation, the participation rate at the next invitation round was assumed to be ~17%, rate vary by age. The assumptions were based on participation rates observed in the Dutch CRC screening program in 2014-2019. <sup>1</sup> | 25-49% participation rate when individuals receive their 1 <sup>st</sup> screening invitation, with variation by sex and age. Of those who did not take part at the 1 <sup>st</sup> invitation, the participation rate at the 2 <sup>nd</sup> invitation round was assumed to be ~60% of the participation rate modelled for the 1 <sup>st</sup> invitation. Of those who did not take part at the 1 <sup>st</sup> and 2 <sup>nd</sup> invitation, the participation rate modelled for the subsequent invitation rounds was assumed to be ~60% of the participation rate used for the 2 <sup>nd</sup> invitation. The assumptions were based on participation rates observed in the NBCSP in 2006-2017. | Participation of 53% to first invitation. 80% adherence to subsequent screening.                                                                                       |
| Re-screening rate                                                 | 93.4% <sup>2</sup>                                                                                                                                                                                                                                                                                                                                                                                    | 93%                                                                                                                                                                                                                                                                                                                                                                                                   | ~70% (modelled rates vary by age and sex)                                                                                                                                                                                                                                                                                                                                                                                                                                                                                                                                                                                                                                                               | 80%                                                                                                                                                                    |
| Follow-up colonoscopy compliance rate, %                          | ~83%                                                                                                                                                                                                                                                                                                                                                                                                  | 82%                                                                                                                                                                                                                                                                                                                                                                                                   | ~71% (modelled rates vary by age and sex)                                                                                                                                                                                                                                                                                                                                                                                                                                                                                                                                                                                                                                                               | 85%                                                                                                                                                                    |
| <i>Colonoscopy test characteristics (per lesion within reach)</i> |                                                                                                                                                                                                                                                                                                                                                                                                       |                                                                                                                                                                                                                                                                                                                                                                                                       |                                                                                                                                                                                                                                                                                                                                                                                                                                                                                                                                                                                                                                                                                                         |                                                                                                                                                                        |
| Specificity, %                                                    | 100% <sup>3</sup>                                                                                                                                                                                                                                                                                                                                                                                     | 100%                                                                                                                                                                                                                                                                                                                                                                                                  | 79% <sup>3,4</sup>                                                                                                                                                                                                                                                                                                                                                                                                                                                                                                                                                                                                                                                                                      | 100%                                                                                                                                                                   |
| Sensitivity for adenoma 1-5 mm, %                                 | 75% <sup>3</sup>                                                                                                                                                                                                                                                                                                                                                                                      | 74%                                                                                                                                                                                                                                                                                                                                                                                                   | 85% <sup>3,4</sup>                                                                                                                                                                                                                                                                                                                                                                                                                                                                                                                                                                                                                                                                                      | 75%                                                                                                                                                                    |
| Sensitivity for adenoma 6-9 mm, %                                 | 85% <sup>3</sup>                                                                                                                                                                                                                                                                                                                                                                                      | 87%                                                                                                                                                                                                                                                                                                                                                                                                   | 92% <sup>3,4</sup>                                                                                                                                                                                                                                                                                                                                                                                                                                                                                                                                                                                                                                                                                      | 85%                                                                                                                                                                    |
| Sensitivity for adenoma >= 10 mm, %                               | 95% <sup>3</sup>                                                                                                                                                                                                                                                                                                                                                                                      | 98%                                                                                                                                                                                                                                                                                                                                                                                                   | 78% <sup>3,4</sup>                                                                                                                                                                                                                                                                                                                                                                                                                                                                                                                                                                                                                                                                                      | 95%                                                                                                                                                                    |
| Sensitivity for CRC, %                                            | 95% <sup>3</sup>                                                                                                                                                                                                                                                                                                                                                                                      | 95%                                                                                                                                                                                                                                                                                                                                                                                                   | 95% <sup>3,4</sup>                                                                                                                                                                                                                                                                                                                                                                                                                                                                                                                                                                                                                                                                                      | 95%                                                                                                                                                                    |
| Reach, %                                                          | 96%                                                                                                                                                                                                                                                                                                                                                                                                   | 100%                                                                                                                                                                                                                                                                                                                                                                                                  | 100%                                                                                                                                                                                                                                                                                                                                                                                                                                                                                                                                                                                                                                                                                                    | 100%                                                                                                                                                                   |
| Rate of adverse events, %                                         | 0.24%                                                                                                                                                                                                                                                                                                                                                                                                 | 0.29%                                                                                                                                                                                                                                                                                                                                                                                                 | 0.27%                                                                                                                                                                                                                                                                                                                                                                                                                                                                                                                                                                                                                                                                                                   | Perforation = 0.17%<br>Haemorrhage = 0.03%                                                                                                                             |
| Colonoscopy surveillance                                          | Colonoscopy surveillance was modelled based on the individual's colonoscopy outcome and the Dutch surveillance guideline recommendations. The compliance to colonoscopy surveillance was assumed to be 80%. Colonoscopy surveillance was assumed to cease at 75 years.                                                                                                                                | Colonoscopy surveillance was modelled based on the individual's colonoscopy outcome and the Dutch surveillance guideline recommendations. The compliance to colonoscopy surveillance was assumed to be 82%. Colonoscopy surveillance was assumed to cease at 75 years.                                                                                                                                | Colonoscopy surveillance was modelled based on the individual's colonoscopy outcome and the Australian surveillance guideline recommendations. The compliance to colonoscopy surveillance was assumed to be 80%. Colonoscopy surveillance was assumed to cease at 75 years.                                                                                                                                                                                                                                                                                                                                                                                                                             | Based on Canadian surveillance guideline recommendations. Compliance to colonoscopy surveillance was assumed to be 80%. Surveillance was assumed to cease at 75 years. |

Abbreviations: CRC, Colorectal Cancer; FIT, Faecal Immunochemical Test; NBCSP, National Bowel Cancer Screening Program.

- a. During the first half of 2014, the cut-off value was set at 15 µg/g feces but this was increased to 47 µg/g from the second half of 2014 onwards. (15;47).<sup>1</sup>
- b. Test characteristics for FIT used in the MISCAN-Colon model are age-specific.
- c. We assume different sensitivity for CRC; early preclinical CRC/late preclinical CRC.
- d. It was assumed that the probability a CRC bleeds and thus the sensitivity of a FIT for CRC depends on the time until clinical diagnosis.
- e. Test characteristics for FIT used in ASCCA are sex-specific.
- f. Specificity and sensitivity for Policy1-Bowel is for the combined result of the two-sample FIT test.

**Table S2 Overview of additional disruption scenarios**

| <b>Scenario</b><br><b>Months disruption, catch-up, recovery period</b>               | <b>Disruption period</b>                                                 | <b>Catch-up</b>                                                                               | <b>Participation with primary screening during recovery period</b>                                   | <b>Participation with diagnostic FU during recovery period</b> |
|--------------------------------------------------------------------------------------|--------------------------------------------------------------------------|-----------------------------------------------------------------------------------------------|------------------------------------------------------------------------------------------------------|----------------------------------------------------------------|
| <i>Reduced participation during recovery period</i>                                  |                                                                          |                                                                                               |                                                                                                      |                                                                |
| 3 months -50% and 3 months -25% in primary screening                                 | 6 months pause to screening from April 2020 to September 2020, inclusive | No catch-up screening                                                                         | Participation reduced relatively by 50% first 3 months and 25% in second 3 months                    | No changes                                                     |
| 12 months -50% in primary screening                                                  | 6 months pause to screening from April 2020 to September 2020, inclusive | No catch-up screening                                                                         | Participation reduced relatively by 50% for 12 months from October 2020 to September 2021, inclusive | No changes                                                     |
| <i>Varying length of disruption and reduced participation during recovery period</i> |                                                                          |                                                                                               |                                                                                                      |                                                                |
| No disruption, 6 months -50% in primary screening                                    | No disruption – 0 months pause                                           | No catch-up screening                                                                         | Participation reduced relatively by 50% for 6 months                                                 | No changes                                                     |
| No disruption, 6 months -50%                                                         | No disruption – 0 months pause                                           | No catch-up screening                                                                         | Participation reduced relatively by 50% for 6 months                                                 | Participation reduced relatively by 50% for 6 months           |
| 3 months disruption, 6 months -50%                                                   | 3 months pause to screening from April 2020 to June 2020, inclusive      | No catch-up screening                                                                         | Participation reduced relatively by 50% for 6 months                                                 | Participation reduced relatively by 50% for 6 months           |
| <i>Reduced participation during recovery period including catch-up screening</i>     |                                                                          |                                                                                               |                                                                                                      |                                                                |
| Immediate catch-up and -50%                                                          | 6 months pause to screening from April 2020 to September 2020, inclusive | Catch-up screening at 50% of usual participation rates over the 6 months following disruption | Participation reduced relatively by 50% for 6 months                                                 | Participation reduced relatively by 50% for 6 months           |

Abbreviations: FU, Follow-up.

## 2. Supplementary Results

### 1. Tables

**Table S3 Outcomes for disruption scenarios vs the comparator for the MISCAN-Colon model.**

| Disruption length<br>Recovery period participation<br>decrease<br>Catch-up screening | Period    | Comparator | 6 months            | 3 months          | 12 months           | 6 months                           | 6 months            | 6 months          | 6 months            |
|--------------------------------------------------------------------------------------|-----------|------------|---------------------|-------------------|---------------------|------------------------------------|---------------------|-------------------|---------------------|
|                                                                                      |           |            | None                | None              | None                | 3 months -50% and<br>3 months -25% | 6 months -50%       | None              | None                |
|                                                                                      |           |            | None                | None              | None                | None                               | None                | None              | None                |
|                                                                                      |           |            |                     |                   |                     |                                    |                     | Immediate         | Delayed             |
| Individuals eligible in primary screening                                            | 2020      | 2,216,024  | -1,107,932 (-50.0%) | -556,344 (-25.0%) | -1,661,878 (-75.0%) | -1,107,763 (-50.0%)                | -1,107,780 (-50.0%) | -557,283 (-25.1%) | -1,046,359 (-47.2%) |
|                                                                                      | 2021      | 2,322,003  | +55 (0.0%)          | +15 (0.0%)        | -580,428 (-25.0%)   | +281 (0.0%)                        | -138 (0.0%)         | +550,827 (+23.7%) | +1,339 (+0.1%)      |
| Individuals participating in primary screening                                       | 2020      | 1,601,057  | -800,471 (-50.0%)   | -400,220 (-25.0%) | -1,200,692 (-75.0%) | -1,000,526 (-62.5%)                | -1,000,535 (-62.5%) | -402,632 (-25.1%) | -755,985 (-47.2%)   |
|                                                                                      | 2021      | 1,677,102  | +40 (0.0%)          | +11 (0.0%)        | -419,223 (-25.0%)   | -104,628 (-6.2%)                   | -209,725 (-12.5%)   | +397,843 (+23.7%) | -967 (-0.1%)        |
| Diagnostic colonoscopy follow-up                                                     | 2020      | 49,349     | -24,688 (-50.0%)    | -12,342 (-25.0%)  | -37,008 (-75.0%)    | -35,471 (-71.9%)                   | -30,846 (-62.5%)    | -12,074 (-24.5%)  | -22,863 (-46.3%)    |
|                                                                                      | 2021      | 50,991     | +12 (0.0%)          | -2 (0.0%)         | -12,737 (-25.0%)    | -6,157 (-12.1%)                    | -6,374 (-12.5%)     | +12,615 (+24.7%)  | +1,685 (+3.3%)      |
| CRC Stage 1 diagnoses                                                                | 2020      | 3,402      | -765 (-22.5%)       | -378 (-11.1%)     | -1,167 (-34.4%)     | -1,066 (-31.3%)                    | -1,064 (-31.3%)     | -333 (-9.8%)      | -700 (-20.6%)       |
|                                                                                      | 2021      | 3,566      | +70 (+2.0%)         | +38 (+1.1%)       | -276 (-7.7%)        | -69 (-1.9%)                        | -190 (-5.3%)        | +421 (+11.8%)     | +159 (+4.5%)        |
|                                                                                      | 2022      | 3,529      | +230 (+6.5%)        | +117 (+3.3%)      | +386 (+10.9%)       | +359 (+10.2%)                      | +370 (+10.5%)       | -44 (-1.2%)       | +767 (+21.7%)       |
|                                                                                      | 2023      | 3,663      | +1 (+0.0%)          | -2 (-0.0%)        | +109 (+3.0%)        | +57 (+1.6%)                        | +101 (+2.8%)        | -13 (-0.4%)       | -106 (-2.9%)        |
|                                                                                      | 2024      | 3,671      | +69 (+1.9%)         | +32 (+0.9%)       | +106 (+2.9%)        | +97 (+2.7%)                        | +101 (+2.7%)        | -4 (-0.1%)        | -32 (-0.9%)         |
|                                                                                      | 2020-2050 | 119,328    | -279 (-0.3%)        | -104 (-0.1%)      | -569 (-0.5%)        | -430 (-0.4%)                       | -475 (-0.4%)        | +20 (+0.0%)       | +11 (0.0%)          |
| CRC Stage 2 diagnoses                                                                | 2020      | 3,452      | -424 (-12.3%)       | -207 (-6.0%)      | -657 (-19.0%)       | -600 (-17.4%)                      | -601 (-17.4%)       | -168 (-4.9%)      | -382 (-11.1%)       |
|                                                                                      | 2021      | 3,599      | +97 (+2.7%)         | +47 (+1.3%)       | -45 (-1.3%)         | +48 (+1.3%)                        | -7 (-0.2%)          | +243 (+6.8%)      | +157 (+4.4%)        |
|                                                                                      | 2022      | 3,588      | +220 (+6.1%)        | +104 (+2.9%)      | +384 (+10.7%)       | +347 (+9.7%)                       | +365 (+10.2%)       | -32 (-0.9%)       | +448 (+12.5%)       |
|                                                                                      | 2023      | 3,716      | +29 (+0.8%)         | +13 (+0.3%)       | +143 (+3.9%)        | +90 (+2.4%)                        | +127 (+3.4%)        | -17 (-0.5%)       | -79 (-2.1%)         |
|                                                                                      | 2024      | 3,750      | +102 (+2.7%)        | +50 (+1.3%)       | +168 (+4.5%)        | +145 (+3.9%)                       | +142 (+3.8%)        | -8 (-0.2%)        | -27 (-0.7%)         |
|                                                                                      | 2020-2050 | 126,478    | +235 (+0.2%)        | +105 (+0.1%)      | +488 (+0.4%)        | +335 (+0.2%)                       | +378 (+0.3%)        | -31 (-0.0%)       | -29 (0.0%)          |
| CRC Stage 3 diagnoses                                                                | 2020      | 3,498      | -345 (-9.9%)        | -166 (-4.8%)      | -535 (-15.3%)       | -486 (-13.9%)                      | -486 (-13.9%)       | -130 (-3.7%)      | -305 (-8.7%)        |
|                                                                                      | 2021      | 3,588      | +123 (+3.4%)        | +63 (+1.8%)       | +38 (+1.1%)         | +110 (+3.1%)                       | +61 (+1.7%)         | +206 (+5.7%)      | +172 (+4.8%)        |
|                                                                                      | 2022      | 3,608      | +219 (+6.1%)        | +109 (+3.0%)      | +399 (+11.1%)       | +356 (+9.9%)                       | +365 (+10.1%)       | -36 (-1.0%)       | +359 (+9.9%)        |
|                                                                                      | 2023      | 3,699      | +36 (+1.0%)         | +14 (+0.4%)       | +162 (+4.4%)        | +106 (+2.9%)                       | +138 (+3.7%)        | -15 (-0.4%)       | -76 (-2.1%)         |
|                                                                                      | 2024      | 3,746      | +109 (+2.9%)        | +52 (+1.4%)       | +187 (+5.0%)        | +155 (+4.1%)                       | +167 (+4.4%)        | -12 (-0.3%)       | -35 (-0.9%)         |
|                                                                                      | 2020-2050 | 125,483    | +446 (+0.3%)        | +238 (+0.2%)      | +910 (+0.7%)        | +684 (+0.5%)                       | +725 (+0.6%)        | -14 (-0.0%)       | -1 (0.0%)           |
| CRC Stage 4 diagnoses                                                                | 2020      | 2,160      | -24 (-1.1%)         | -7 (-0.3%)        | -53 (-2.5%)         | -46 (-2.1%)                        | -48 (-2.2%)         | +5 (+0.2%)        | -21 (-1.0%)         |
|                                                                                      | 2021      | 2,217      | +73 (+3.3%)         | +34 (+1.5%)       | +118 (+5.3%)        | +105 (+4.7%)                       | +105 (+4.7%)        | +25 (+1.1%)       | +67 (+3.0%)         |
|                                                                                      | 2022      | 2,252      | +68 (+3.0%)         | +33 (+1.5%)       | +144 (+6.4%)        | +117 (+5.2%)                       | +123 (+5.5%)        | -13 (-0.6%)       | +46 (+2.0%)         |
|                                                                                      | 2023      | 2,322      | +36 (+1.6%)         | +19 (+0.8%)       | +136 (+6.1%)        | +81 (+3.5%)                        | +57 (+2.5%)         | -4 (-0.2%)        | -25 (-1.1%)         |
|                                                                                      | 2024      | 2,358      | +44 (+1.8%)         | +20 (+0.8%)       | +86 (+3.7%)         | +66 (+2.8%)                        | +71 (+3.0%)         | -1 (-0.0%)        | -10 (-0.4%)         |
|                                                                                      | 2020-2050 | 80,407     | +400 (+0.5%)        | +176 (+0.2%)      | +790 (+1.0%)        | +557 (+0.7%)                       | +626 (+0.8%)        | -11 (0.0%)        | -47 (-0.1%)         |
| Total CRC diagnoses                                                                  | 2020      | 12,512     | -1,558 (-12.5%)     | -759 (-6.1%)      | -2,412 (-19.3%)     | -2,198 (-17.6%)                    | -2,198 (-17.6%)     | -626 (-5.0%)      | -1,408 (-11.3%)     |
|                                                                                      | 2021      | 12,970     | +363 (+2.8%)        | +183 (+1.4%)      | -166 (-1.3%)        | +157 (+1.5%)                       | -31 (-0.2%)         | +895 (+6.9%)      | +555 (+4.3%)        |
|                                                                                      | 2022      | 12,977     | +737 (+5.7%)        | +362 (+2.8%)      | +1,312 (+10.1%)     | +1,178 (+9.1%)                     | +1,224 (+9.4%)      | -125 (-1.0%)      | +1,619 (+12.5%)     |
|                                                                                      | 2023      | 13,400     | +103 (+0.8%)        | 44 (+0.3%)        | +496 (+3.7%)        | +311 (+2.3%)                       | +433 (+3.2%)        | -50 (-0.4%)       | -287 (-2.1%)        |
|                                                                                      | 2024      | 13,526     | +323 (+2.4%)        | +153 (+1.1%)      | +548 (+4.0%)        | +463 (+3.4%)                       | +481 (+3.6%)        | -25 (-0.2%)       | -104 (-0.8%)        |
|                                                                                      | 2020-2050 | 451,697    | +803 (+0.2%)        | +414 (+0.1%)      | +1,619 (0.4%)       | +1,147 (+0.2%)                     | +1,255 (+0.3%)      | -36 (0.0%)        | -67 (0.0%)          |
| CRC deaths                                                                           | 2020-2050 | 169,016    | +678 (+0.4%)        | +324 (+0.2%)      | +1,360 (0.8%)       | +975 (+0.6%)                       | +609 (+0.6%)        | -7 (0.0%)         | -52 (0.0%)          |
| LYs lost                                                                             | 2020-2050 | -          | 7,894               | 3,909             | 15,528              | 11,531                             | 12,618              | 377               | 461                 |

Abbreviations: CRC, Colorectal Cancer; LYs, Life Years

**Table S4 Outcomes for disruption scenarios vs the comparator for the ASCCA model.**

| Disruption length                              |           | 6 months   |                     | 3 months          |                     | 12 months           |                     | 6 months                        |                     | 6 months      |  | 6 months  |  | 6 months |  |
|------------------------------------------------|-----------|------------|---------------------|-------------------|---------------------|---------------------|---------------------|---------------------------------|---------------------|---------------|--|-----------|--|----------|--|
| Recovery period participation decrease         |           | None       |                     | None              |                     | None                |                     | 3 months -50% and 3 months -25% |                     | 6 months -50% |  | None      |  | None     |  |
| Catch-up screening                             |           | None       |                     | None              |                     | None                |                     | None                            |                     | None          |  | Immediate |  | Delayed  |  |
|                                                | Period    | Comparator |                     |                   |                     |                     |                     |                                 |                     |               |  |           |  |          |  |
| Individuals eligible in primary screening      | 2020      | 2,164,781  | -1,082,391 (-50.0%) | -541,195 (-25.0%) | -1,623,586 (-75.0%) | -1,082,409 (-50.0%) | -1,082,409 (-50.0%) | -541,195 (-25.0%)               | -1,017,810 (-47.0%) |               |  |           |  |          |  |
|                                                | 2021      | 2,149,991  | 0 (0.0%)            | 0 (0.0%)          | -537,498 (-25.0%)   | +373 (0.0%)         | -21 (0.0%)          | +535,161 (+24.9%)               | +57,624 (+2.7%)     |               |  |           |  |          |  |
| Individuals participating in primary screening | 2020      | 1,522,797  | -761,398 (-50.0%)   | -380,699 (-25.0%) | -1,142,098 (-75.0%) | -952,001 (-62.5%)   | -952,001 (-62.5%)   | -380,699 (-25.0%)               | -716,071 (-47.0%)   |               |  |           |  |          |  |
|                                                | 2021      | 1,512,047  | 0 (0.0%)            | 0 (0.0%)          | -378,012 (-25.0%)   | -86,613 (-5.7%)     | -189,270 (-12.5%)   | +376,601 (+24.9%)               | +40,907 (+2.7%)     |               |  |           |  |          |  |
| Diagnostic colonoscopy follow-up               | 2020      | 57,195     | -28,597 (-50.0%)    | -14,299 (-25.0%)  | -42,896 (-75.0%)    | -39,323 (-68.8%)    | -39,323 (-68.8%)    | -14,299 (-25.0%)                | -26,980 (-47.2%)    |               |  |           |  |          |  |
|                                                | 2021      | 57,606     | 0 (0.0%)            | 0 (0.0%)          | -14,402 (-25.0%)    | -6,018 (-10.4%)     | -10,804 (-18.8%)    | +14,922 (+25.9%)                | +2,542 (+4.4%)      |               |  |           |  |          |  |
| CRC Stage 1 diagnoses                          | 2020      | 4,610      | -1,148 (-24.9%)     | -620 (-13.4%)     | -1,676 (-36.4%)     | -1,542 (-33.4%)     | -1,543 (-33.5%)     | -620 (-13.4%)                   | -1,099 (-23.8%)     |               |  |           |  |          |  |
|                                                | 2021      | 4,508      | +79 (+1.8%)         | +40 (+0.9%)       | -406 (-9.0%)        | -105 (-2.3%)        | -285 (-6.3%)        | +642 (+14.2%)                   | +273 (+6.1%)        |               |  |           |  |          |  |
| CRC Stage 2 diagnoses                          | 2022      | 4,357      | +376 (+8.6%)        | +188 (4.3%)       | +603 (+13.8%)       | +543 (+12.5%)       | +556 (+12.8%)       | -66 (-1.5%)                     | 1038 (23.8%)        |               |  |           |  |          |  |
|                                                | 2023      | 4,407      | +23 (+0.5%)         | +11 (0.3%)        | +222 (+5.0%)        | +117 (+2.6%)        | +182 (+4.1%)        | -8 (-0.2%)                      | -142 (-3.2%)        |               |  |           |  |          |  |
|                                                | 2024      | 4,306      | +164 (+3.8%)        | +82 (1.9%)        | +257 (+6.0%)        | +225 (+5.2%)        | +228 (+5.3%)        | -10 (-0.2%)                     | -35 (-0.8%)         |               |  |           |  |          |  |
|                                                | 2020-2050 | 133,611    | +30 (+0.0%)         | +15 (+0.0%)       | +69 (+0.1%)         | +84 (+0.1%)         | +79 (+0.1%)         | +5 (+0.0%)                      | +28 (+0.0%)         |               |  |           |  |          |  |
|                                                | 2020      | 3,597      | -467 (-13.0%)       | -234 (-6.5%)      | -702 (-19.5%)       | -641 (-17.8%)       | -643 (-17.9%)       | -232 (-6.5%)                    | -439 (-12.2%)       |               |  |           |  |          |  |
|                                                | 2021      | 3,561      | +69 (+1.9%)         | +35 (+1.0%)       | -125 (-3.5%)        | +3 (+0.1%)          | -77 (-2.2%)         | +322 (+9.0%)                    | +208 (+5.8%)        |               |  |           |  |          |  |
|                                                | 2022      | 3,475      | +321 (+9.2%)        | +160 (+4.6%)      | +515 (+14.8%)       | +462 (+13.3%)       | +472 (+13.6%)       | -27 (-0.8%)                     | +517 (+14.9%)       |               |  |           |  |          |  |
|                                                | 2023      | 3,481      | +45 (+1.3%)         | +23 (+0.7%)       | +230 (+6.6%)        | +133 (+3.8%)        | +189 (+5.4%)        | -6 (-0.2%)                      | -62 (-1.8%)         |               |  |           |  |          |  |
|                                                | 2024      | 3,441      | +127 (+3.7%)        | +63 (+1.8%)       | +213 (+6.2%)        | +180 (+5.2%)        | +186 (+5.4%)        | -12 (-0.4%)                     | -35 (-1.0%)         |               |  |           |  |          |  |
|                                                | 2020-2050 | 107,162    | +520 (+0.5%)        | +260 (+0.2%)      | +1,045 (+1.0%)      | +835 (+0.8%)        | +903 (+0.8%)        | +27 (0.0%)                      | +105 (+0.1%)        |               |  |           |  |          |  |
| CRC Stage 3 diagnoses                          | 2020      | 3,001      | -270 (-9.0%)        | -135 (-4.5%)      | -404 (-13.5%)       | -369 (-12.3%)       | -371 (-12.4%)       | -135 (-4.5%)                    | -248 (-8.3%)        |               |  |           |  |          |  |
|                                                | 2021      | 2,973      | +90 (+3.0%)         | +45 (+1.5%)       | +4 (+0.1%)          | +73 (+2.4%)         | +26 (+0.9%)         | +216 (+7.3%)                    | +182 (+6.1%)        |               |  |           |  |          |  |
| CRC Stage 4 diagnoses                          | 2022      | 2,910      | +264 (+9.1%)        | +132 (+4.5%)      | +440 (+15.1%)       | +388 (+13.3%)       | +402 (+13.8%)       | -28 (-0.9%)                     | +315 (+10.8%)       |               |  |           |  |          |  |
|                                                | 2023      | 2,921      | +28 (+1.0%)         | +14 (+0.5%)       | +174 (+6.0%)        | +96 (+3.3%)         | +141 (+4.8%)        | -1 (-0.1%)                      | -52 (-1.8%)         |               |  |           |  |          |  |
|                                                | 2024      | 2,899      | +109 (+3.8%)        | +54 (+1.9%)       | +176 (+6.1%)        | +150 (+5.2%)        | +152 (+5.2%)        | -11 (-0.4%)                     | -24 (-0.8%)         |               |  |           |  |          |  |
|                                                | 2020-2050 | 89,863     | +644 (+0.7%)        | +322 (+0.4%)      | +1,287 (+1.4%)      | +1,010 (+1.1%)      | +1,094 (+1.2%)      | +24 (0.0%)                      | +75 (+0.1%)         |               |  |           |  |          |  |
|                                                | 2020      | 2,446      | -72 (-3.0%)         | -36 (-1.5%)       | -109 (-4.4%)        | -99 (-4.0%)         | -100 (-4.1%)        | -36 (-1.5%)                     | -66 (-2.7%)         |               |  |           |  |          |  |
|                                                | 2021      | 2,431      | +70 (+2.9%)         | +35 (+1.4%)       | +71 (+2.9%)         | +84 (+3.5%)         | +70 (+2.9%)         | +81 (+3.3%)                     | +93 (+3.8%)         |               |  |           |  |          |  |
| Total CRC diagnoses                            | 2022      | 2,404      | +143 (+6.0%)        | +72 (+3.0%)       | +249 (+10.4%)       | +217 (+9.0%)        | +228 (+9.5%)        | -11 (-0.5%)                     | +112 (+4.7%)        |               |  |           |  |          |  |
|                                                | 2023      | 2,403      | +29 (+1.2%)         | +14 (+0.6%)       | +113 (+4.7%)        | +113 (+4.7%)        | +93 (+3.9%)         | -4 (-0.1%)                      | -26 (-1.1%)         |               |  |           |  |          |  |
|                                                | 2024      | 2,397      | +51 (+2.1%)         | +26 (+1.1%)       | +90 (+3.8%)         | +72 (+3.0%)         | +73 (+3.1%)         | -3 (-0.1%)                      | -13 (-0.6%)         |               |  |           |  |          |  |
|                                                | 2020-2050 | 74,389     | +609 (+0.8%)        | +305 (+0.4%)      | +1,214 (+1.6%)      | +954 (+1.3%)        | +1,015 (+1.4%)      | +18 (0.0%)                      | +59 (+0.1%)         |               |  |           |  |          |  |
|                                                | 2020      | 13,562     | -1,866 (-13.8%)     | -933 (-6.9%)      | -2,799 (-20.6%)     | -2,559 (-18.9%)     | -2,566 (-18.9%)     | -932 (-6.9%)                    | -1,760 (-13.0%)     |               |  |           |  |          |  |
|                                                | 2021      | 13,473     | +309 (+2.3%)        | +154 (+1.1%)      | -457 (-3.4%)        | +54 (+0.4%)         | -266 (-2.0%)        | +1261 (+9.4%)                   | +757 (+5.6%)        |               |  |           |  |          |  |
| CRC deaths                                     | 2022      | 13,146     | +1,104 (+8.4%)      | +552 (+4.2%)      | +1,807 (+13.7%)     | +1,610 (+12.2%)     | +1,657 (+12.6%)     | -131 (-1.0%)                    | +1,982 (+15.1%)     |               |  |           |  |          |  |
|                                                | 2023      | 13,213     | +125 (+0.9%)        | +63 (+0.5%)       | +739 (+5.6%)        | +416 (+3.1%)        | +606 (+4.6%)        | -19 (-0.1%)                     | -282 (-2.1%)        |               |  |           |  |          |  |
|                                                | 2024      | 13,043     | +451 (+3.5%)        | +226 (+1.7%)      | +737 (+5.7%)        | +627 (+4.8%)        | +640 (+4.9%)        | -37 (-0.3%)                     | -107 (-0.8%)        |               |  |           |  |          |  |
|                                                | 2020-2050 | 405,025    | +1,803 (+0.4%)      | +902 (+0.2%)      | +3,615 (+0.9%)      | +2,883 (+0.7%)      | +3,091 (+0.8%)      | +74 (0.0%)                      | +267 (+0.1%)        |               |  |           |  |          |  |
|                                                | 2020-2050 | 142,621    | +881 (+0.6%)        | +440 (+0.3%)      | +1,762 (+1.2%)      | +1,395 (+1.0%)      | +1,500 (+1.1%)      | +38 (0.0%)                      | +131 (+0.1%)        |               |  |           |  |          |  |
| LYs lost                                       | 2020-2050 |            | 4,978               | 2,489             | 10,028              | 8,065               | 8,828               | 405                             | 1,212               |               |  |           |  |          |  |

Abbreviations: CRC, Colorectal Cancer; LYs, Life Years.

**Table S5 Outcomes for disruption scenarios vs the comparator for the Policy1-Bowel model.**

| Disruption length                              |            | 6 months  | 3 months            | 12 months         | 6 months                        | 6 months            | 6 months            | 6 months          |                     |
|------------------------------------------------|------------|-----------|---------------------|-------------------|---------------------------------|---------------------|---------------------|-------------------|---------------------|
| Recovery period participation decrease         |            | None      | None                | None              | 3 months -50% and 3 months -25% | 6 months -50%       | None                | None              |                     |
| Catch-up screening                             |            | None      | None                | None              | None                            | None                | Immediate           | Delayed           |                     |
| Period                                         | Comparator |           |                     |                   |                                 |                     |                     |                   |                     |
| Individuals eligible in primary screening      | 2020       | 3,588,703 | -1,794,352 (-50.0%) | -897,176 (-25.0%) | -2,691,527 (-75.0%)             | -1,794,352 (-50.0%) | -1,794,352 (-50.0%) | -897,176 (-25.0%) | -1,826,650 (-50.9%) |
|                                                | 2021       | 3,692,353 | 0 (0.0%)            | 0 (0.0%)          | -923,088 (-25.0%)               | 0 (0.0%)            | 0 (0.0%)            | +897,176 (+24.3%) | -177,233 (-4.8%)    |
| Individuals participating in primary screening | 2020       | 1,322,389 | -673,616 (-50.9%)   | -336,961 (-25.5%) | -1,010,422 (-76.4%)             | -842,291 (-63.7%)   | -842,291 (-63.7%)   | -337,849 (-25.5%) | -673,704 (-50.9%)   |
|                                                | 2021       | 1,377,194 | 0 (0.0%)            | 0 (0.0%)          | -343,453 (-24.9%)               | -85,575 (-6.2%)     | -171,651 (-12.5%)   | +313,812 (+22.8%) | -65,440 (-4.8%)     |
| Diagnostic colonoscopy follow-up               | 2020       | 78,031    | -37,220 (-47.7%)    | -18,647 (-23.9%)  | -55,730 (-71.4%)                | -51,104 (-65.5%)    | -51,104 (-65.5%)    | -18,697 (-24.0%)  | -37,187 (-47.7%)    |
|                                                | 2021       | 80,343    | 0 (0.0%)            | 0 (0.0%)          | -18,694 (-23.3%)                | -8,246 (-10.3%)     | -14,052 (-17.5%)    | +18,470 (+23.0%)  | +736 (+0.9%)        |
| CRC Stage 1 diagnoses                          | 2020       | 4,650     | -884 (-19.0%)       | -441 (-9.5%)      | -1,318 (-28.3%)                 | -1,218 (-26.2%)     | -1,215 (-26.1%)     | -447 (-9.6%)      | -879 (-18.9%)       |
|                                                | 2021       | 4,774     | +47 (+1.0%)         | +29 (+0.6%)       | -366 (-7.7%)                    | -128 (-2.7%)        | -278 (-5.8%)        | +458 (+9.6%)      | +174 (+3.6%)        |
|                                                | 2022       | 4,352     | +117 (+2.7%)        | +63 (+1.4%)       | +80 (+1.8%)                     | +177 (+4.1%)        | +180 (+4.1%)        | -3 (-0.1%)        | +175 (+4.0%)        |
|                                                | 2023       | 4,380     | +13 (+0.3%)         | +7 (+0.2%)        | +42 (+1.0%)                     | +60 (+1.4%)         | +70 (+1.6%)         | -13 (-0.3%)       | +99 (+2.3%)         |
|                                                | 2024       | 4,395     | +57 (+1.3%)         | +7 (+0.2%)        | +66 (+1.5%)                     | +67 (+1.5%)         | +68 (+1.5%)         | -9 (-0.2%)        | +121 (+2.7%)        |
|                                                | 2020-2050  | 198,089   | -314 (-0.2%)        | -206 (-0.1%)      | -616 (-0.3%)                    | -439 (-0.2%)        | -517 (-0.3%)        | -25 (0.0%)        | +921 (+0.5%)        |
| CRC Stage 2 diagnoses                          | 2020       | 7,131     | -336 (-4.7%)        | -164 (-2.3%)      | -476 (-6.7%)                    | -440 (-6.2%)        | -434 (-6.1%)        | -166 (-2.3%)      | -324 (-4.5%)        |
|                                                | 2021       | 7,099     | +100 (+1.4%)        | +54 (+0.8%)       | -015 (-0.2%)                    | +88 (+1.2%)         | +48 (+0.7%)         | +197 (+2.8%)      | +164 (+2.3%)        |
|                                                | 2022       | 6,261     | +129 (+2.1%)        | +60 (+1.0%)       | +171 (+2.7%)                    | +218 (+3.5%)        | +237 (+3.8%)        | -3 (-0.0%)        | +132 (+2.1%)        |
|                                                | 2023       | 6,287     | +78 (+1.2%)         | +30 (+0.5%)       | +157 (+2.5%)                    | +125 (+2.0%)        | +126 (+2.0%)        | +16 (+0.3%)       | +86 (+1.4%)         |
|                                                | 2024       | 6,321     | +79 (+1.2%)         | +34 (+0.5%)       | +153 (+2.4%)                    | +156 (+2.5%)        | +185 (+2.9%)        | 0 (0.0%)          | +80 (+1.3%)         |
|                                                | 2020-2050  | 243,506   | +1,355 (+0.6%)      | +580 (+0.2%)      | +2,716 (+1.1%)                  | +1,978 (+0.8%)      | +2,181 (+0.9%)      | +96 (0.0%)        | +167 (+0.1%)        |
| CRC Stage 3 diagnoses                          | 2020       | 4,319     | -310 (-7.2%)        | -153 (-3.5%)      | -465 (-10.8%)                   | -426 (-9.9%)        | -427 (-9.9%)        | -161 (-3.7%)      | -320 (-7.4%)        |
|                                                | 2021       | 4,270     | +108 (+2.5%)        | +65 (+1.5%)       | +7 (+0.2%)                      | +68 (+1.6%)         | +23 (+0.5%)         | +202 (+4.7%)      | +147 (+3.4%)        |
|                                                | 2022       | 5,059     | +173 (+3.4%)        | +85 (+1.7%)       | +189 (+3.7%)                    | +266 (+5.2%)        | +288 (+5.7%)        | +10 (+0.2%)       | +160 (3.2%)         |
|                                                | 2023       | 5,076     | +68 (+1.3%)         | +24 (+0.5%)       | +152 (+3.0%)                    | +137 (+2.7%)        | +168 (+3.3%)        | +12 (+0.2%)       | +88 (1.7%)          |
|                                                | 2024       | 5,088     | +123 (+2.4%)        | +71 (+1.4%)       | +152 (+3.0%)                    | +151 (+3.0%)        | +165 (+3.2%)        | +16 (+0.3%)       | +84 (1.6%)          |
|                                                | 2020-2050  | 138,697   | +1,430 (+1.0%)      | +733 (+0.5%)      | +2,778 (+2.0%)                  | +2,103 (+1.5%)      | +2,283 (+1.6%)      | +86 (+0.1%)       | +175 (+0.1%)        |
| CRC Stage 4 diagnoses                          | 2020       | 1,291     | -7 (-0.6%)          | -2 (-0.1%)        | -5 (-0.4%)                      | -8 (-0.6%)          | +1 (0.0%)           | +2 (+0.1%)        | +7 (+0.6%)          |
|                                                | 2021       | 1,253     | +58 (+4.6%)         | +28 (+2.2%)       | +88 (+7.1%)                     | +83 (+6.6%)         | +78 (+6.2%)         | +36 (+2.8%)       | +67 (+5.3%)         |
|                                                | 2022       | 2,786     | +74 (+2.7%)         | +35 (+1.3%)       | +108 (+3.9%)                    | +107 (+3.8%)        | +111 (+4.0%)        | 15 (+0.6%)        | +68 (+2.4%)         |
|                                                | 2023       | 2,805     | +43 (+1.5%)         | +17 (+0.6%)       | +106 (+3.8%)                    | +88 (+3.1%)         | +93 (+3.3%)         | -7 (-0.3%)        | +33 (+1.2%)         |
|                                                | 2024       | 2,814     | +50 (+1.8%)         | +25 (+0.9%)       | +83 (+2.9%)                     | +78 (+2.8%)         | +74 (+2.6%)         | 0 (0.0%)          | +21 (+0.7%)         |
|                                                | 2020-2050  | 38,273    | +1,082 (+2.8%)      | +566 (+1.5%)      | +2,262 (+5.9%)                  | +1,724 (+4.5%)      | +1,883 (+4.9%)      | +48 (+0.1%)       | -86 (-0.2%)         |
| Total CRC diagnoses                            | 2020       | 17,391    | -1,537 (-8.8%)      | -759 (-4.4%)      | -2,264 (-13.0%)                 | -2,092 (-12.0%)     | -2,075 (-11.9%)     | -773 (-4.4%)      | -1,516 (-8.7%)      |
|                                                | 2021       | 17,397    | +313 (+1.8%)        | +176 (+1.0%)      | -286 (-1.6%)                    | +111 (+0.6%)        | -129 (-0.7%)        | +892 (+5.1%)      | +551 (+3.2%)        |
|                                                | 2022       | 18,458    | +492 (+2.7%)        | +243 (+1.3%)      | +548 (+3.0%)                    | +767 (+4.2%)        | +816 (+4.4%)        | +20 (+0.1%)       | +534 (+2.9%)        |
|                                                | 2023       | 18,548    | +202 (+1.1%)        | +78 (+0.4%)       | +456 (+2.5%)                    | +409 (+2.2%)        | +456 (+2.5%)        | +8 (+0.0%)        | +307 (+1.7%)        |
|                                                | 2024       | 18,618    | +308 (+1.7%)        | +138 (+0.7%)      | +454 (+2.4%)                    | +452 (+2.4%)        | +492 (+2.6%)        | +7 (+0.0%)        | +305 (+1.6%)        |
|                                                | 2020-2050  | 618,564   | +3,552 (+0.6%)      | +1,672 (+0.3%)    | +7,140 (+1.2%)                  | +5,365 (+0.9%)      | +5,831 (+0.9%)      | +205 (0.0%)       | +1,177 (+0.2%)      |
| CRC deaths                                     | 2020-2050  | 196,336   | +1,961 (+1.0%)      | +979 (+0.5%)      | +3,968 (+2.0%)                  | +2,897 (+1.5%)      | +3,233 (+1.6%)      | +126 (+0.1%)      | +423 (+0.2%)        |
| LYs lost                                       | 2020-2050  | -         | 19,675              | 9,995             | 38,872                          | 28,452              | 31,092              | 1,516             | 4,504               |

Abbreviations: CRC, Colorectal Cancer; LYs, Life Years.



**Table S6 Outcomes for disruption scenarios vs the comparator for the OncoSim model.**

| Disruption length                              |            | 6 months  | 3 months            | 12 months           | 6 months                        | 6 months            | 6 months            | 6 months            |                     |
|------------------------------------------------|------------|-----------|---------------------|---------------------|---------------------------------|---------------------|---------------------|---------------------|---------------------|
| Recovery period participation decrease         |            | None      | None                | None                | 3 months -50% and 3 months -25% | 6 months -50%       | None                | None                |                     |
| Catch-up screening                             |            | None      | None                | None                | None                            | None                | Immediate           | Delayed             |                     |
| Period                                         | Comparator |           |                     |                     |                                 |                     |                     |                     |                     |
| Individuals eligible in primary screening      | 2020       | 4,802,414 | -2,401,207 (-50.0%) | -1,200,604 (-25.0%) | -3,601,811 (-75.0%)             | -2,401,207 (-50.0%) | -2,401,207 (-50.0%) | -1,200,604 (-25.0%) | +2,257,135 (+47.0%) |
|                                                | 2021       | 5,030,086 | 0 (0.0%)            | 0 (0.0%)            | +1,257,521 (+25.0%)             | 0 (0.0%)            | 0 (0.0%)            | +1,257,521 (+25.0%) | 0 (0.0%)            |
| Individuals participating in primary screening | 2020       | 2,017,014 | -1,008,418 (-50.0%) | -564,466 (-28.0%)   | -1,576,236 (-78.1%)             | -1,231,159 (-61.0%) | -1,231,159 (-61.0%) | -600,894 (-29.8%)   | -1,040,954 (-51.6%) |
|                                                | 2021       | 2,112,636 | +126,860 (+6.0%)    | +125,884 (+6.0%)    | -216,625 (-10.3%)               | +10,464 (+0.5%)     | -106,174 (-5.0%)    | +595,739 (+28.2%)   | +103,105 (+4.9%)    |
| Diagnostic colonoscopy follow-up               | 2020       | 88,193    | -56,717 (-64.3%)    | -36,055 (-40.9%)    | -66,470 (-75.4%)                | -60,105 (-68.2%)    | -63,140 (-71.6%)    | -36,990 (-41.9%)    | -43,689 (-49.5%)    |
|                                                | 2021       | 89,557    | -652 (-0.7%)        | +2,061 (+2.3%)      | -32,058 (-35.8%)                | -12,065 (-13.5%)    | -22,403 (-25.0%)    | +35,503 (+39.6%)    | +3,067 (+3.4%)      |
| CRC Stage 1 diagnoses                          | 2020       | 5,919     | -818 (-13.8%)       | -482 (-8.2%)        | -979 (-16.5%)                   | -892 (-15.1%)       | -932 (-15.7%)       | -506 (-8.6%)        | -643 (-10.9%)       |
|                                                | 2021       | 6,050     | +72 (+1.2%)         | +69 (+1.1%)         | -356 (-5.9%)                    | -82 (-1.4%)         | -218 (-3.6%)        | +594 (+9.8%)        | +229 (+3.8%)        |
|                                                | 2022       | 6,153     | +194 (+3.1%)        | +240 (+3.9%)        | +228 (+3.7%)                    | +208 (+3.4%)        | +243 (+4.0%)        | -259 (-4.2%)        | +175 (+2.8%)        |
|                                                | 2023       | 6,087     | +214 (+3.5%)        | +307 (+5.0%)        | +295 (+4.8%)                    | +252 (+4.1%)        | +287 (+4.7%)        | +141 (+2.3%)        | +128 (+2.1%)        |
|                                                | 2024       | 5,908     | +254 (+4.3%)        | +321 (+5.4%)        | +333 (+5.6%)                    | +291 (+4.9%)        | +325 (+5.5%)        | -147 (-2.5%)        | +170 (+2.9%)        |
|                                                | 2020-2050  | 223,131   | +92 (+0.0%)         | +31 (+0.0%)         | +237 (+0.1%)                    | +150 (+0.1%)        | +215 (+0.1%)        | -89 (-0.0%)         | +309 (+0.1%)        |
| CRC Stage 2 diagnoses                          | 2020       | 6,391     | -300 (-4.7%)        | -168 (-2.6%)        | -380 (-5.9%)                    | -332 (-5.2%)        | -350 (-5.5%)        | -157 (-2.5%)        | -221 (-3.5%)        |
|                                                | 2021       | 6,470     | +128 (+2.0%)        | +86 (+1.3%)         | +12 (+0.2%)                     | +78 (+1.2%)         | +37 (+0.6%)         | +255 (+3.9%)        | +146 (+2.3%)        |
|                                                | 2022       | 6,510     | +206 (+3.2%)        | +305 (+4.7%)        | +292 (+4.5%)                    | +246 (+3.8%)        | +283 (+4.4%)        | +29 (+0.4%)         | +114 (+1.8%)        |
|                                                | 2023       | 6,555     | +208 (+3.2%)        | +284 (+4.3%)        | +294 (+4.5%)                    | +248 (+3.8%)        | +285 (+4.4%)        | -82 (-1.3%)         | +161 (+2.5%)        |
|                                                | 2024       | 6,599     | +186 (+2.8%)        | +286 (+4.3%)        | +273 (+4.1%)                    | +227 (+3.4%)        | +264 (+4.0%)        | -16 (-0.2%)         | +116 (+1.8%)        |
|                                                | 2020-2050  | 248,068   | +897 (+0.4%)        | +534 (+0.2%)        | +1,656 (+0.7%)                  | +1,162 (+0.5%)      | +1,387 (+0.6%)      | +121 (0.0%)         | +110 (+0.0%)        |
| CRC Stage 3 diagnoses                          | 2020       | 5,401     | -243 (-4.5%)        | -151 (-2.8%)        | -302 (-5.6%)                    | -263 (-4.9%)        | -276 (-5.1%)        | -139 (-2.6%)        | -182 (-3.4%)        |
|                                                | 2021       | 5,402     | +115 (+2.1%)        | +83 (+1.5%)         | +12 (+0.2%)                     | +79 (+1.5%)         | +48 (+0.9%)         | +235 (+4.4%)        | +152 (+2.8%)        |
|                                                | 2022       | 5,596     | +243 (+4.3%)        | +352 (+6.3%)        | +341 (+6.1%)                    | +301 (+5.4%)        | +334 (+6.0%)        | +76 (+1.4%)         | +95 (+1.7%)         |
|                                                | 2023       | 5,618     | +198 (+3.5%)        | +307 (+5.5%)        | +296 (+5.3%)                    | +256 (+4.6%)        | +288 (+5.1%)        | -13 (-0.2%)         | +118 (+2.1%)        |
|                                                | 2024       | 5,663     | +199 (+3.5%)        | +285 (+5.0%)        | +274 (+4.8%)                    | +234 (+4.1%)        | +267 (+4.7%)        | +31 (+0.5%)         | +119 (+2.1%)        |
|                                                | 2020-2050  | 212,240   | +994 (+0.5%)        | +594 (+0.3%)        | +1,739 (+0.8%)                  | +1,319 (+0.6%)      | +1,517 (+0.7%)      | +20 (0.0%)          | -29 (0.0%)          |
| CRC Stage 4 diagnoses                          | 2020       | 4,010     | -56 (-1.4%)         | -31 (-0.8%)         | -76 (-1.9%)                     | -65 (-1.6%)         | -70 (-1.7%)         | -24 (-0.6%)         | -39 (-1.0%)         |
|                                                | 2021       | 4,047     | +91 (+2.3%)         | +64 (+1.6%)         | +93 (+2.3%)                     | +95 (+2.3%)         | +91 (+2.3%)         | +85 (+2.1%)         | +96 (+2.4%)         |
|                                                | 2022       | 4,035     | +142 (+3.5%)        | +227 (+5.6%)        | +219 (+5.4%)                    | +167 (+4.1%)        | +190 (+4.7%)        | +102 (+2.5%)        | +85 (+2.1%)         |
|                                                | 2023       | 4,035     | +142 (+3.5%)        | +203 (+5.0%)        | +195 (+4.8%)                    | +167 (+4.1%)        | +190 (+4.7%)        | -99 (-2.4%)         | +62 (+1.5%)         |
|                                                | 2024       | 4,125     | +145 (+3.5%)        | +231 (+5.6%)        | +200 (+4.8%)                    | +171 (+4.1%)        | +194 (+4.7%)        | +79 (+1.9%)         | +87 (+2.1%)         |
|                                                | 2020-2050  | 158,094   | +861 (+0.5%)        | +512 (+0.3%)        | +1,574 (+1.0%)                  | +1,101 (+0.7%)      | +1,270 (+0.8%)      | +82 (+0.1%)         | -164 (-0.1%)        |
| Total CRC diagnoses                            | 2020       | 21,721    | -1,417 (-6.5%)      | -832 (-3.8%)        | -1,737 (-8.0%)                  | -1,551 (-7.1%)      | -1,628 (-7.5%)      | -827 (-3.8%)        | -1,084 (-5.0%)      |
|                                                | 2021       | 21,970    | +406 (+1.8%)        | +302 (+1.4%)        | -238 (-1.1%)                    | +170 (+0.8%)        | -41 (-0.2%)         | +1,169 (+5.3%)      | +622 (+2.8%)        |
|                                                | 2022       | 22,295    | +785 (+3.5%)        | +1,124 (+5.0%)      | +1,080 (+4.8%)                  | +923 (+4.1%)        | +1,050 (+4.7%)      | -53 (-0.2%)         | +470 (+2.1%)        |
|                                                | 2023       | 22,295    | +762 (+3.4%)        | +1,101 (+4.9%)      | +1,080 (+4.8%)                  | +923 (+4.1%)        | +1,050 (+4.7%)      | -53 (-0.2%)         | +470 (+2.1%)        |
|                                                | 2024       | 22,295    | +785 (+3.5%)        | +1,124 (+5.0%)      | +1,080 (+4.8%)                  | +923 (+4.1%)        | +1,050 (+4.7%)      | -53 (-0.2%)         | +493 (+2.2%)        |
|                                                | 2020-2050  | 841,511   | +2,844 (+0.3%)      | +1,671 (+0.2%)      | +5,212 (+0.6%)                  | +3,733 (+0.4%)      | +4,393 (+0.5%)      | +142 (0.0%)         | +229 (+0.0%)        |
| CRC deaths                                     | 2020-2050  | 311,133   | +1,319 (+0.4%)      | +799 (+0.3%)        | +2,366 (+0.8%)                  | +1,707 (+0.5%)      | +2,002 (+0.6%)      | +65 (0.0%)          | -66 (0.0%)          |
| LYs lost                                       | 2020-2050  | -         | 14,562              | 26,136              | 24,949                          | 18,834              | 22,106              | 17,757              | 3,312               |

Abbreviations: CRC, Colorectal Cancer; LYs, Life Years.

**Table S7 Outcomes for additional disruption scenarios vs the comparator for the MISCAN-Colon model.**

| Disruption length                              |            | 0 months      | 0 months          | 6 months          | 3 months          | 6 months          | 6 months            |                     |
|------------------------------------------------|------------|---------------|-------------------|-------------------|-------------------|-------------------|---------------------|---------------------|
| Recovery period participation decrease         |            | 6 months -50% | 6 months -50%     | 6 months -50%     | 6 months -50%     | 12 months -50% in | 6 months            |                     |
|                                                |            | in primary    | None              | Immediate         | None              | primary screening | 3 months -50% and 3 |                     |
| Catch-up screening                             |            | screening     | None              | None              | None              | None              | months -25% in      |                     |
|                                                |            | None          | None              | None              | None              | None              | primary screening   |                     |
|                                                |            | None          | None              | None              | None              | None              | None                |                     |
| Period                                         | Comparator |               |                   |                   |                   |                   |                     |                     |
| Individuals eligible in primary screening      | 2020       | 2,216,024     | -125 (0.0%)       | -132 (0.0%)       | -556,344 (-25.1%) | -553,827 (-25.0%) | -1,107,746 (-50.0%) | -1,107,725 (-50.0%) |
|                                                | 2021       | 2,322,003     | +41 (0.0%)        | +43 (0.0%)        | +561,721 (+24.2%) | +26 (0.0%)        | -368 (0.0%)         | +255 (0.0%)         |
| Individuals participating in primary screening | 2020       | 1,601,057     | -400,332 (-25.0%) | -400,336 (-25.0%) | -801,655 (-50.1%) | -800,442 (-50.0%) | -1,000,517 (-62.5%) | -1,000,505 (-62.5%) |
|                                                | 2021       | 1,677,102     | +30 (0.0%)        | +31 (0.0%)        | -10,851 (-0.6%)   | +19 (0.0%)        | -629,079 (-37.5%)   | -104,646 (-6.2%)    |
| Diagnostic colonoscopy follow-up               | 2020       | 49,349        | -12,346 (-25.0%)  | -21,598 (-43.8%)  | -32,813 (-66.5%)  | -30,836 (-62.5%)  | -30,845 (-62.5%)    | -30,836 (-62.5%)    |
|                                                | 2021       | 50,991        | +3 (0.0%)         | -6,366 (-12.5%)   | -3,467 (-6.8%)    | +14 (0.0%)        | -19,118 (-37.5%)    | -3,167 (-6.2%)      |
| CRC Stage 1 diagnoses                          | 2020       | 3,402         | -382 (-11.2%)     | -575 (-16.9%)     | -959 (-28.2%)     | -778 (-22.9%)     | -969 (-28.5%)       | -965 (-28.4%)       |
|                                                | 2021       | 3,566         | +34 (+1.0%)       | +50 (+1.4%)       | -105 (-2.9%)      | +72 (+2.0%)       | -508 (-14.2%)       | -5 (-0.2%)          |
|                                                | 2022       | 3,529         | +152 (+4.3%)      | +217 (+6.2%)      | +337 (+9.5%)      | +270 (+7.6%)      | +375 (+10.6%)       | +316 (+9.0%)        |
|                                                | 2023       | 3,663         | -4 (-0.1%)        | -10 (-0.3%)       | +89 (+2.4%)       | -3 (-0.1%)        | +221 (+6.0%)        | +38 (+1.1%)         |
|                                                | 2024       | 3,671         | +36 (+1.0%)       | +52 (+1.4%)       | +74 (+2.0%)       | +72 (+2.0%)       | +81 (+2.2%)         | +90 (+2.5%)         |
|                                                | 2020-2050  | 119,328       | -125 (-0.1%)      | -207 (-0.2%)      | -389 (-0.3%)      | -290 (-0.2%)      | -541 (-0.5%)        | -391 (-0.3%)        |
| CRC Stage 2 diagnoses                          | 2020       | 3,452         | -211 (-6.1%)      | -317 (-9.2%)      | -536 (-15.5%)     | -430 (-12.4%)     | -541 (-15.7%)       | -543 (-15.7%)       |
|                                                | 2021       | 3,599         | +48 (+1.3%)       | +69 (+1.9%)       | +29 (+0.8%)       | +101 (+2.8%)      | -193 (-5.4%)        | +78 (+2.2%)         |
|                                                | 2022       | 3,588         | +136 (+3.8%)      | +200 (+5.6%)      | +333 (+9.3%)      | +253 (+7.0%)      | +375 (+10.4%)       | +304 (+8.5%)        |
|                                                | 2023       | 3,716         | +9 (+0.2%)        | +13 (+0.3%)       | +108 (+2.9%)      | +18 (+0.5%)       | +236 (+6.4%)        | +68 (+1.8%)         |
|                                                | 2024       | 3,750         | +53 (+1.4%)       | +78 (+2.1%)       | +119 (+3.2%)      | +106 (+2.8%)      | +138 (+3.7%)        | +127 (+3.4%)        |
|                                                | 2020-2050  | 126,478       | +76 (+0.1%)       | +155 (+0.1%)      | +301 (+0.2%)      | +224 (+0.2%)      | +418 (+0.3%)        | +306 (+0.2%)        |
| CRC Stage 3 diagnoses                          | 2020       | 3,498         | -169 (-4.8%)      | -255 (-7.3%)      | -430 (-12.3%)     | -351 (-10.0%)     | -439 (-12.6%)       | -436 (-12.5%)       |
|                                                | 2021       | 3,588         | +65 (+1.8%)       | +94 (+2.6%)       | +87 (+2.4%)       | +126 (+3.5%)      | -90 (-2.5%)         | +116 (+3.2%)        |
|                                                | 2022       | 3,608         | +133 (+3.7%)      | +198 (+5.5%)      | +334 (+9.3%)      | +254 (+7.0%)      | +388 (+10.7%)       | +310 (+8.6%)        |
|                                                | 2023       | 3,699         | +4 (+0.1%)        | +24 (+0.6%)       | +114 (+3.1%)      | +33 (+0.9%)       | +247 (+6.7%)        | +84 (+2.3%)         |
|                                                | 2024       | 3,746         | +49 (+1.3%)       | +80 (+2.1%)       | +129 (+3.4%)      | +102 (+2.7%)      | +160 (+4.3%)        | +139 (+3.7%)        |
|                                                | 2020-2050  | 125,483       | +177 (+0.1%)      | +318 (+0.3%)      | +604 (+0.5%)      | +422 (+0.3%)      | +818 (+0.7%)        | +592 (+0.5%)        |
| CRC Stage 4 diagnoses                          | 2020       | 2,160         | -14 (-0.6%)       | -19 (-0.9%)       | -39 (-1.8%)       | -30 (-1.4%)       | -41 (-1.9%)         | -41 (-1.9%)         |
|                                                | 2021       | 2,217         | +36 (+1.6%)       | +55 (+2.5%)       | +93 (+4.2%)       | +73 (+3.3%)       | +83 (+3.7%)         | +93 (+4.2%)         |
|                                                | 2022       | 2,252         | +34 (+1.5%)       | +48 (+2.1%)       | +110 (+4.9%)      | +74 (+3.3%)       | +144 (+6.4%)        | +97 (+4.3%)         |
|                                                | 2023       | 2,322         | +14 (+0.6%)       | +21 (+0.9%)       | +55 (+2.4%)       | +29 (+1.3%)       | +94 (+4.0%)         | +47 (+2.0%)         |
|                                                | 2024       | 2,358         | +19 (+0.8%)       | +30 (+1.3%)       | +56 (+2.4%)       | +39 (+1.7%)       | +75 (+3.2%)         | +52 (+2.2%)         |
|                                                | 2020-2050  | 80,407        | +150 (+0.2%)      | +239 (+0.3%)      | +478 (+0.6%)      | +341 (+0.4%)      | +699 (+0.9%)        | +489 (+0.6%)        |
| Total CRC diagnoses                            | 2020       | 12,512        | -776 (-6.2%)      | -1,166 (-9.3%)    | -1,964 (-15.7%)   | -1,588 (-12.7%)   | -1,991 (-15.9%)     | -1,985 (-15.9%)     |
|                                                | 2021       | 12,970        | +184 (+1.4%)      | +268 (+2.1%)      | +104 (+0.8%)      | +373 (+2.9%)      | -708 (-5.5%)        | +282 (+2.2%)        |
|                                                | 2022       | 12,977        | +455 (+3.5%)      | +663 (+5.1%)      | +1,115 (+8.6%)    | +850 (+6.6%)      | +1,281 (+9.9%)      | +1,027 (+7.9%)      |
|                                                | 2023       | 13,400        | +23 (+0.2%)       | +48 (+0.4%)       | +365 (+2.7%)      | +78 (+0.6%)       | +799 (+6.0%)        | +238 (+1.8%)        |
|                                                | 2024       | 13,526        | +157 (+1.2%)      | +240 (+1.8%)      | +378 (+2.8%)      | +320 (+2.4%)      | +453 (+3.4%)        | +409 (+3.0%)        |
|                                                | 2020-2050  | 451,697       | +278 (+0.1%)      | +506 (+0.1%)      | +994 (+0.2%)      | +698 (+0.2%)      | +1,394 (+0.3%)      | +996 (+0.2%)        |
| CRC deaths                                     | 2020-2050  | 169,016       | +234 (+0.1%)      | +426 (+0.3%)      | +804 (+0.5%)      | +609 (+0.4%)      | +1,172 (+0.7%)      | +837 (+0.5%)        |
| LYs lost                                       | 2020-2050  | -             | 3,181             | 5,407             | 10,027            | 7,311             | 13,908              | 9,913               |

Abbreviations: CRC, Colorectal Cancer; LYs, Life Years.

**Table S8 Outcomes for additional disruption scenarios vs the comparator for the ASCCA model.**

| Disruption length                              |            |           |                   | 0 months                           | 0 months          | 6 months          | 3 months            | 6 months                            | 6 months                                             |
|------------------------------------------------|------------|-----------|-------------------|------------------------------------|-------------------|-------------------|---------------------|-------------------------------------|------------------------------------------------------|
| Recovery period participation decrease         |            |           |                   | 6 months -50% in primary screening | 6 months -50%     | 6 months -50%     | 6 months -50%       | 12 months -50% in primary screening | 3 months -50% and 3 months -25% in primary screening |
| Catch-up screening                             |            |           |                   | None                               | None              | Immediate         | None                | None                                | None                                                 |
| Period                                         | Comparator |           |                   |                                    |                   |                   |                     |                                     |                                                      |
| Individuals eligible in primary screening      | 2020       | 2,164,781 | -6 (0.0%)         | -37 (0.0%)                         | -541,232 (-25.0%) | -541,232 (-25.0%) | -1,082,394 (-50.0%) | -1,082,394 (-50.0%)                 |                                                      |
|                                                | 2021       | 2,149,991 | 0 (0.0%)          | 0 (0.0%)                           | 535,173 (24.9%)   | 0 (0.0%)          | -40 (0.0%)          | -12 (0.0%)                          |                                                      |
| Individuals participating in primary screening | 2020       | 1,522,797 | -381,181 (-25.0%) | -381,204 (-25.0%)                  | -761,904 (-50.0%) | -761,904 (-50.0%) | -951,989 (-62.5%)   | -951,989 (-62.5%)                   |                                                      |
|                                                | 2021       | 1,512,047 | 0 (0.0%)          | 0 (0.0%)                           | -1,196 (-0.1%)    | 0 (0.0%)          | -567,791 (-37.6%)   | -94,985 (-6.3%)                     |                                                      |
| Diagnostic colonoscopy follow-up               | 2020       | 57,195    | -14,310 (-25.0%)  | -21,450 (-37.5%)                   | -35,749 (-62.5%)  | -35,749 (-62.5%)  | -35,752 (-62.5%)    | -35,752 (-62.5%)                    |                                                      |
|                                                | 2021       | 57,606    | 0 (0.0%)          | 0 (0.0%)                           | -7,076 (-12.3%)   | 0 (0.0%)          | -21,624 (-37.5%)    | -3,623 (-6.3%)                      |                                                      |
| CRC Stage 1 diagnoses                          | 2020       | 4,610     | -620 (-13.4%)     | -883 (-19.2%)                      | -1,412 (-30.6%)   | -1,412 (-30.6%)   | -1,412 (-30.6%)     | -1,412 (-30.6%)                     |                                                      |
|                                                | 2021       | 4,508     | +38 (+0.8%)       | +58 (+1.3%)                        | -145 (-3.2%)      | +98 (+2.2%)       | -688 (-15.3%)       | -34 (-0.8%)                         |                                                      |
| CRC Stage 2 diagnoses                          | 2022       | 4,357     | 293 (6.7%)        | 303 (6.9%)                         | 454 (10.4%)       | 490 (11.3%)       | 578 (13.3%)         | 531 (12.2%)                         |                                                      |
|                                                | 2023       | 4,407     | 5 (0.1%)          | 16 (0.4%)                          | 174 (4.0%)        | 28 (0.6%)         | 463 (10.5%)         | 111 (2.5%)                          |                                                      |
|                                                | 2024       | 4,306     | 102 (2.4%)        | 112 (2.6%)                         | 172 (4.0%)        | 194 (4.5%)        | 221 (5.1%)          | 215 (5.0%)                          |                                                      |
|                                                | 2020-2050  | 133,611   | +52 (0.0%)        | +38 (0.0%)                         | +75 (+0.1%)       | +53 (0.0%)        | +156 (+0.1%)        | +76 (+0.1%)                         |                                                      |
|                                                | 2020       | 3,597     | -234 (-6.5%)      | -350 (-9.7%)                       | -584 (-16.2%)     | -584 (-16.2%)     | -587 (-16.3%)       | -585 (-16.3%)                       |                                                      |
|                                                | 2021       | 3,561     | +33 (+0.9%)       | +51 (+1.4%)                        | -14 (-0.4%)       | +85 (+2.4%)       | -258 (-7.3%)        | +28 (+0.8%)                         |                                                      |
|                                                | 2022       | 3,475     | 233 (6.7%)        | 252 (7.2%)                         | 390 (11.2%)       | 412 (11.9%)       | 488 (14.0%)         | 446 (12.8%)                         |                                                      |
|                                                | 2023       | 3,481     | 13 (0.4%)         | 33 (1.0%)                          | 176 (5.1%)        | 56 (1.6%)         | 406 (11.7%)         | 117 (3.4%)                          |                                                      |
|                                                | 2024       | 3,441     | 68 (2.0%)         | 86 (2.5%)                          | 140 (4.1%)        | 150 (4.4%)        | 180 (5.2%)          | 162 (4.7%)                          |                                                      |
|                                                | 2020-2050  | 107,162   | +209 (+0.2%)      | +378 (+0.4%)                       | +774 (+0.7%)      | +637 (+0.6%)      | +959 (+0.9%)        | +669 (+0.6%)                        |                                                      |
| CRC Stage 3 diagnoses                          | 2020       | 3,001     | -135 (-4.5%)      | -202 (-6.7%)                       | -337 (-11.2%)     | -337 (-11.2%)     | -336 (-11.2%)       | -337 (-11.2%)                       |                                                      |
|                                                | 2021       | 2,973     | +45 (+1.5%)       | +67 (+2.3%)                        | +57 (+1.9%)       | +112 (+3.8%)      | -84 (-2.8%)         | +80 (+2.7%)                         |                                                      |
| CRC Stage 4 diagnoses                          | 2022       | 2,910     | 191 (6.6%)        | 210 (7.2%)                         | 338 (11.6%)       | 342 (11.8%)       | 424 (14.6%)         | 371 (12.7%)                         |                                                      |
|                                                | 2023       | 2,921     | -4 (-0.1%)        | 17 (0.6%)                          | 131 (4.5%)        | 31 (1.1%)         | 312 (10.7%)         | 80 (2.7%)                           |                                                      |
|                                                | 2024       | 2,899     | 49 (1.7%)         | 71 (2.4%)                          | 109 (3.8%)        | 125 (4.3%)        | 126 (4.3%)          | 129 (4.5%)                          |                                                      |
|                                                | 2020-2050  | 89,863    | +215 (+0.2%)      | +456 (+0.5%)                       | +928 (+1.0%)      | +778 (+0.9%)      | +1,070 (+1.2%)      | +785 (+0.9%)                        |                                                      |
|                                                | 2020       | 2,446     | -36 (-1.5%)       | -55 (-2.2%)                        | -91 (-3.7%)       | -91 (-3.7%)       | -92 (-3.8%)         | -91 (-3.7%)                         |                                                      |
|                                                | 2021       | 2,431     | +35 (+1.4%)       | +52 (+2.2%)                        | +72 (+3.0%)       | +87 (+3.6%)       | +36 (+1.5%)         | +79 (+3.2%)                         |                                                      |
| Total CRC diagnoses                            | 2022       | 2,404     | 94 (3.9%)         | 116 (4.8%)                         | 195 (8.1%)        | 188 (7.8%)        | 245 (10.2%)         | 199 (8.3%)                          |                                                      |
|                                                | 2023       | 2,403     | -6 (-0.3%)        | 15 (0.6%)                          | 81 (3.4%)         | 30 (1.2%)         | 165 (6.9%)          | 51 (2.1%)                           |                                                      |
|                                                | 2024       | 2,397     | 7 (0.3%)          | 31 (1.3%)                          | 53 (2.2%)         | 57 (2.4%)         | 43 (1.8%)           | 52 (2.2%)                           |                                                      |
|                                                | 2020-2050  | 74,389    | +126 (+0.2%)      | +412 (+0.6%)                       | +851 (+1.1%)      | +717 (+1.0%)      | +849 (+1.1%)        | +683 (+0.9%)                        |                                                      |
|                                                | 2020       | 13,562    | -934 (-6.9%)      | -1,399 (-10.3%)                    | -2,332 (-17.2%)   | -2,332 (-17.2%)   | -2,335 (-17.2%)     | -2,333 (-17.2%)                     |                                                      |
|                                                | 2021       | 13,473    | +151 (+1.1%)      | +229 (+1.7%)                       | -30 (-0.2%)       | +383 (+2.8%)      | -994 (-7.4%)        | +153 (+1.1%)                        |                                                      |
| CRC deaths LYs lost                            | 2022       | 13,146    | 810 (6.2%)        | 880 (6.7%)                         | 1,376 (10.5%)     | 1,432 (10.9%)     | 1,734 (13.2%)       | 1,547 (11.8%)                       |                                                      |
|                                                | 2023       | 13,213    | 9 (0.1%)          | 82 (0.6%)                          | 562 (4.3%)        | 144 (1.1%)        | 1346 (10.2%)        | 359 (2.7%)                          |                                                      |
| LYs lost                                       | 2024       | 13,043    | 226 (1.7%)        | 300 (2.3%)                         | 474 (3.6%)        | 526 (4.0%)        | 569 (4.4%)          | 559 (4.3%)                          |                                                      |
|                                                | 2020-2050  | 405,025   | +601 (+0.1%)      | +1,284 (+0.3%)                     | +2,628 (+0.6%)    | +2,185 (+0.5%)    | +3,034 (+0.7%)      | +2,214 (+0.5%)                      |                                                      |
| LYs lost                                       | 2020-2050  | 142,621   | +251 (+0.2%)      | +622 (+0.4%)                       | +1,287 (+0.9%)    | +1,062 (+0.7%)    | +1,395 (+1.0%)      | +1,048 (+0.7%)                      |                                                      |
|                                                | 2020-2050  | -         | 1,718             | 3,811                              | 8,007             | 6,300             | 8,450               | 6,164                               |                                                      |

Abbreviations: CRC, Colorectal Cancer; LYs, Life Years.

**Table S9 Outcomes for additional disruption scenarios vs the comparator for the Policy1-Bowel model.**

| Disruption length                              |            | 0 month                            | 0 month           | 6 month           | 3 month           | 6 month                             | 6 month                                              |                     |
|------------------------------------------------|------------|------------------------------------|-------------------|-------------------|-------------------|-------------------------------------|------------------------------------------------------|---------------------|
| Recovery period participation decrease         |            | 6 months -50% in primary screening | 6 months -50%     | 6 months -50%     | 6 months -50%     | 12 months -50% in primary screening | 3 months -50% and 3 months -25% in primary screening |                     |
| Catch-up screening                             |            | None                               | None              | Immediate         | None              | None                                | None                                                 |                     |
| Period                                         | Comparator |                                    |                   |                   |                   |                                     |                                                      |                     |
| Individuals eligible in primary screening      | 2020       | 3,588,703                          | 0 (0.0%)          | 0 (0.0%)          | -897,176 (-25.0%) | -897,176 (-25.0%)                   | -1,794,352 (-50.0%)                                  | -1,794,352 (-50.0%) |
|                                                | 2021       | 3,692,353                          | 0 (0.0%)          | 0 (0.0%)          | +897,176 (+24.3%) | 0 (0.0%)                            | 0 (0.0%)                                             | 0 (0.0%)            |
| Individuals participating in primary screening | 2020       | 1,322,389                          | -336,961 (-25.5%) | -336,785 (-25.5%) | -674,104 (-51.0%) | -673,610 (-50.9%)                   | -842,122 (-63.7%)                                    | -842,122 (-63.7%)   |
|                                                | 2021       | 1,377,194                          | 0 (0.0%)          | 0 (0.0%)          | -15,864 (-1.2%)   | 0 (0.0%)                            | -515,187 (-37.4%)                                    | -88,288 (-6.4%)     |
| Diagnostic colonoscopy follow-up               | 2020       | 78,031                             | -18,647 (-23.9%)  | -27,981 (-35.9%)  | -46,478 (-59.6%)  | -46,523 (-59.6%)                    | -46,454 (-59.5%)                                     | -46,454 (-59.5%)    |
|                                                | 2021       | 80,343                             | 0 (0.0%)          | 0 (0.0%)          | -9,372 (-11.7%)   | 0 (0.0%)                            | -28,041 (-34.9%)                                     | -4,831 (-6.0%)      |
| CRC Stage 1 diagnoses                          | 2020       | 4,650                              | -441 (-9.5%)      | -657 (-14.1%)     | -1,097 (-23.6%)   | -1,103 (-23.7%)                     | -1,105 (-23.8%)                                      | -1,110 (-23.9%)     |
|                                                | 2021       | 4,774                              | +29 (+0.6%)       | +34 (+0.7%)       | -165 (-3.4%)      | +61 (+1.3%)                         | -595 (-12.5%)                                        | -69 (-1.4%)         |
|                                                | 2022       | 4,352                              | +117 (+2.7%)      | +118 (+2.7%)      | +162 (+3.7%)      | +174 (+4.0%)                        | +44 (+1.0%)                                          | +141 (+3.3%)        |
|                                                | 2023       | 4,380                              | +13 (+0.3%)       | -1 (+0.0%)        | +75 (+1.7%)       | +8 (+0.2%)                          | +16 (+0.4%)                                          | +37 (+0.8%)         |
|                                                | 2024       | 4,395                              | +57 (+1.3%)       | +67 (+1.5%)       | +92 (+2.1%)       | +99 (+2.3%)                         | +9 (+0.2%)                                           | +65 (+1.5%)         |
|                                                | 2020-2050  | 198,089                            | -206 (-0.1%)      | -157 (-0.1%)      | -356 (-0.2%)      | -376 (-0.2%)                        | -595 (-0.3%)                                         | -404 (-0.2%)        |
| CRC Stage 2 diagnoses                          | 2020       | 7,131                              | -164 (-2.3%)      | -238 (-3.3%)      | -391 (-5.5%)      | -415 (-5.8%)                        | -381 (-5.3%)                                         | -390 (-5.5%)        |
|                                                | 2021       | 7,099                              | +54 (+0.8%)       | +85 (+1.2%)       | +75 (+1.1%)       | +126 (+1.8%)                        | -124 (-1.7%)                                         | +85 (+1.2%)         |
|                                                | 2022       | 6,261                              | +129 (+2.1%)      | +122 (+1.9%)      | +206 (+3.3%)      | +170 (+2.7%)                        | +136 (+2.2%)                                         | +176 (+2.8%)        |
|                                                | 2023       | 6,287                              | +78 (+1.2%)       | +61 (+1.0%)       | +115 (+1.8%)      | +91 (+1.4%)                         | +99 (+1.6%)                                          | +92 (+1.5%)         |
|                                                | 2024       | 6,321                              | +79 (+1.2%)       | +65 (+1.0%)       | +155 (+2.5%)      | +115 (+1.8%)                        | +119 (+1.9%)                                         | +147 (+2.3%)        |
|                                                | 2020-2050  | 243,506                            | +580 (+0.2%)      | +778 (+0.3%)      | +1,739 (+0.7%)    | +1,502 (+0.6%)                      | +2,694 (+1.1%)                                       | +1,773 (+0.7%)      |
| CRC Stage 3 diagnoses                          | 2020       | 4,319                              | -153 (-3.5%)      | -239 (-5.5%)      | -391 (-9.1%)      | -384 (-8.9%)                        | -398 (-9.2%)                                         | -401 (-9.3%)        |
|                                                | 2021       | 4,270                              | +65 (+1.5%)       | +95 (+2.2%)       | +58 (+1.4%)       | +133 (+3.1%)                        | -86 (-2.0%)                                          | +87 (+2.0%)         |
|                                                | 2022       | 5,059                              | +173 (+3.4%)      | +146 (+2.9%)      | +259 (+5.1%)      | +220 (+4.3%)                        | +126 (+2.5%)                                         | +210 (+4.2%)        |
|                                                | 2023       | 5,076                              | +68 (+1.3%)       | +50 (+1.0%)       | +138 (+2.7%)      | +86 (+1.7%)                         | +106 (+2.1%)                                         | +104 (+2.0%)        |
|                                                | 2024       | 5,088                              | +123 (+2.4%)      | +100 (+2.0%)      | +153 (+3.0%)      | +146 (+2.9%)                        | +113 (+2.2%)                                         | +131 (+2.6%)        |
|                                                | 2020-2050  | 138,697                            | +733 (+0.5%)      | +840 (+0.6%)      | +1,809 (+1.3%)    | +1,598 (+1.2%)                      | +2,722 (+2.0%)                                       | +1,828 (+1.3%)      |
| CRC Stage 4 diagnoses                          | 2020       | 1,291                              | -2 (-0.1%)        | -2 (-0.2%)        | +7 (+0.5%)        | -11 (-0.9%)                         | +6 (+0.5%)                                           | +11 (+0.8%)         |
|                                                | 2021       | 1,253                              | +28 (+2.2%)       | +46 (+3.7%)       | +77 (+6.1%)       | +68 (+5.4%)                         | +78 (+6.2%)                                          | +76 (+6.1%)         |
|                                                | 2022       | 2,786                              | +74 (+2.7%)       | +52 (+1.9%)       | +98 (+3.5%)       | +88 (+3.2%)                         | +95 (+3.4%)                                          | +106 (+3.8%)        |
|                                                | 2023       | 2,805                              | +43 (+1.5%)       | +30 (+1.1%)       | +70 (+2.5%)       | +58 (+2.1%)                         | +87 (+3.1%)                                          | +72 (+2.6%)         |
|                                                | 2024       | 2,814                              | +50 (+1.8%)       | +32 (+1.1%)       | +63 (+2.2%)       | +57 (+2.0%)                         | +88 (+3.1%)                                          | +72 (+2.6%)         |
|                                                | 2020-2050  | 38,273                             | +566 (+1.5%)      | +646 (+1.7%)      | +1,454 (+3.8%)    | +1,234 (+3.2%)                      | +2,209 (+5.8%)                                       | +1,604 (+4.2%)      |
| Total CRC diagnoses                            | 2020       | 17,391                             | -759 (-4.4%)      | -1,136 (-6.5%)    | -1,872 (-10.8%)   | -1,913 (-11.0%)                     | -1,878 (-10.8%)                                      | -1,891 (-10.9%)     |
|                                                | 2021       | 17,397                             | +176 (+1.0%)      | +260 (+1.5%)      | +46 (+0.3%)       | +388 (+2.2%)                        | -727 (-4.2%)                                         | +179 (+1.0%)        |
|                                                | 2022       | 18,458                             | +492 (+2.7%)      | +439 (+2.4%)      | +725 (+3.9%)      | +652 (+3.5%)                        | +401 (+2.2%)                                         | +633 (+3.4%)        |
|                                                | 2023       | 18,548                             | +202 (+1.1%)      | +141 (+0.8%)      | +399 (+2.2%)      | +243 (+1.3%)                        | +309 (+1.7%)                                         | +305 (+1.6%)        |
|                                                | 2024       | 18,618                             | +308 (+1.7%)      | +263 (+1.4%)      | +463 (+2.5%)      | +417 (+2.2%)                        | +330 (+1.8%)                                         | +415 (+2.2%)        |
|                                                | 2020-2050  | 618,564                            | +1,672 (+0.3%)    | +2,107 (+0.3%)    | +4,647 (+0.8%)    | +3,958 (+0.6%)                      | +7,030 (+1.1%)                                       | +4,801 (+0.8%)      |
| CRC deaths                                     | 2020-2050  | 196,336                            | +979 (+0.5%)      | +1,250 (+0.6%)    | +2,625 (+1.3%)    | +2,218 (+1.1%)                      | +3,949 (+2.0%)                                       | +2,722 (+1.4%)      |
| LYs lost                                       | 2020-2050  | -                                  | 9,995             | 12,706            | 26,399            | 22,080                              | 38,560                                               | 26,980              |

Abbreviations: CRC, Colorectal Cancer; LYs, Life Years.

**Table S10 Outcomes for additional disruption scenarios vs the comparator for the OncoSim model.**

| Disruption length                              |            | 0 month       | 0 month           | 6 months          | 3 months            | 6 months                            | 6 months                                             |                     |
|------------------------------------------------|------------|---------------|-------------------|-------------------|---------------------|-------------------------------------|------------------------------------------------------|---------------------|
| Recovery period participation decrease         |            | 6 months -50% | 6 months -50%     | 6 months -50%     | 6 months -50%       | 12 months -50% in primary screening | 3 months -50% and 3 months -25% in primary screening |                     |
| Catch-up screening                             |            | None          | None              | Immediate         | None                | None                                | None                                                 |                     |
| Period                                         | Comparator |               |                   |                   |                     |                                     |                                                      |                     |
| Individuals eligible in primary screening      | 2020       | 4,802,414     | 0 (0.0%)          | 0 (0.0%)          | -1,200,604 (-25.0%) | -1,200,604 (-25.0%)                 | -2,401,207 (-50.0%)                                  | -2,401,207 (-50.0%) |
|                                                | 2021       | 5,030,086     | 0 (0.0%)          | 0 (0.0%)          | +1,257,521 (+25.0%) | 0 (0.0%)                            | 0 (0.0%)                                             | 0 (0.0%)            |
| Individuals participating in primary screening | 2020       | 2,017,014     | -565,216 (-28.0%) | -565,216 (-28.0%) | -1,041,975 (-51.7%) | -1,008,946 (-50.0%)                 | -1,231,159 (-61.0%)                                  | -1,231,159 (-61.0%) |
|                                                | 2021       | 2,112,636     | +123,447 (+5.8%)  | +125,169 (+5.9%)  | +143,792 (+6.8%)    | +126,536 (+6.0%)                    | -573,822 (-27.2%)                                    | +10,619 (+0.5%)     |
| Diagnostic colonoscopy follow-up               | 2020       | 88,193        | -21,360 (-24.2%)  | -36,297 (-41.2%)  | -55,025 (-62.4%)    | -56,925 (-64.5%)                    | -60,105 (-68.2%)                                     | -63,140 (-71.6%)    |
|                                                | 2021       | 89,557        | +1,085 (+1.2%)    | +1,157 (+1.3%)    | -8,045 (-9.0%)      | -5,669 (-6.3%)                      | -35,014 (-39.1%)                                     | -15,191 (-17.0%)    |
| CRC Stage 1 diagnoses                          | 2020       | 5,919         | -313 (-5.3%)      | -502 (-8.5%)      | -800 (-13.5%)       | -834 (-14.1%)                       | -892 (-15.1%)                                        | -932 (-15.7%)       |
|                                                | 2021       | 6,050         | +52 (+0.5%)       | +52 (+0.9%)       | +1 (0.0%)           | -3 (-0.1%)                          | -457 (-7.5%)                                         | -115 (-1.9%)        |
|                                                | 2022       | 6,153         | +51 (+0.8%)       | +125 (+2.0%)      | -379 (-6.2%)        | +177 (+2.9%)                        | +95 (+1.5%)                                          | +228 (+3.7%)        |
|                                                | 2023       | 6,087         | +72 (+1.2%)       | +123 (+2.0%)      | -9 (-0.1%)          | +197 (+3.2%)                        | +116 (+1.9%)                                         | +271 (+4.5%)        |
|                                                | 2024       | 5,908         | +93 (+1.6%)       | +165 (+2.8%)      | -328 (-5.6%)        | +260 (+4.4%)                        | +136 (+2.3%)                                         | +310 (+5.2%)        |
|                                                | 2020-2050  | 223,131       | +31 (0.0%)        | +69 (0.0%)        | +162 (+0.1%)        | +85 (+0.0%)                         | +259 (+0.1%)                                         | +159 (+0.1%)        |
| CRC Stage 2 diagnoses                          | 2020       | 6,391         | -112 (-1.7%)      | -178 (-2.8%)      | -282 (-4.4%)        | -303 (-4.7%)                        | -332 (-5.2%)                                         | -350 (-5.5%)        |
|                                                | 2021       | 6,470         | +56 (+0.9%)       | +84 (+1.3%)       | +82 (+1.3%)         | +92 (+1.4%)                         | -56 (-0.9%)                                          | +71 (+1.1%)         |
|                                                | 2022       | 6,510         | +55 (+0.8%)       | +109 (+1.7%)      | -152 (-2.3%)        | +213 (+3.3%)                        | +102 (+1.6%)                                         | +267 (+4.1%)        |
|                                                | 2023       | 6,555         | +55 (+0.8%)       | +133 (+2.0%)      | -239 (-3.7%)        | +214 (+3.3%)                        | +103 (+1.6%)                                         | +269 (+4.1%)        |
|                                                | 2024       | 6,599         | +56 (+0.8%)       | +111 (+1.7%)      | -176 (-2.7%)        | +193 (+2.9%)                        | +103 (+1.6%)                                         | +248 (+3.8%)        |
|                                                | 2020-2050  | 248,068       | +271 (+0.1%)      | +496 (+0.2%)      | +1,054 (+0.4%)      | +989 (+0.4%)                        | +1,667 (+0.7%)                                       | +1,246 (+0.5%)      |
| CRC Stage 3 diagnoses                          | 2020       | 5,401         | -107 (-2.0%)      | -155 (-2.9%)      | -233 (-4.3%)        | -251 (-4.7%)                        | -263 (-4.9%)                                         | -276 (-5.1%)        |
|                                                | 2021       | 5,402         | +51 (+0.9%)       | +74 (+1.4%)       | +95 (+1.8%)         | +93 (+1.7%)                         | -33 (-0.6%)                                          | +73 (+1.4%)         |
|                                                | 2022       | 5,596         | +112 (+2.0%)      | +159 (+2.8%)      | -124 (-2.2%)        | +272 (+4.9%)                        | +152 (+2.7%)                                         | +319 (+5.7%)        |
|                                                | 2023       | 5,618         | +67 (+1.2%)       | +114 (+2.0%)      | -233 (-4.1%)        | +227 (+4.0%)                        | +107 (+1.9%)                                         | +274 (+4.9%)        |
|                                                | 2024       | 5,663         | +45 (+0.8%)       | +92 (+1.6%)       | -148 (-2.6%)        | +205 (+3.6%)                        | +108 (+1.9%)                                         | +252 (+4.5%)        |
|                                                | 2020-2050  | 212,240       | +372 (+0.2%)      | +586 (+0.3%)      | +1,102 (+0.5%)      | +1,119 (+0.5%)                      | +1,718 (+0.8%)                                       | +1,422 (+0.7%)      |
| CRC Stage 4 diagnoses                          | 2020       | 4,010         | -22 (-0.6%)       | -30 (-0.7%)       | -53 (-1.3%)         | -59 (-1.5%)                         | -65 (-1.6%)                                          | -70 (-1.7%)         |
|                                                | 2021       | 4,047         | +41 (+1.0%)       | +59 (+1.4%)       | +90 (+2.2%)         | +93 (+2.3%)                         | +74 (+1.8%)                                          | +96 (+2.4%)         |
|                                                | 2022       | 4,035         | +48 (+1.2%)       | +82 (+2.0%)       | -13 (-0.3%)         | +146 (+3.6%)                        | +77 (+1.9%)                                          | +180 (+4.5%)        |
|                                                | 2023       | 4,035         | +48 (+1.2%)       | +82 (+2.0%)       | -207 (-5.1%)        | +146 (+3.6%)                        | +77 (+1.9%)                                          | +180 (+4.5%)        |
|                                                | 2024       | 4,125         | +49 (+1.2%)       | +84 (+2.0%)       | -37 (-0.9%)         | +149 (+3.6%)                        | +79 (+1.9%)                                          | +184 (+4.5%)        |
|                                                | 2020-2050  | 158,094       | +351 (+0.2%)      | +531 (+0.3%)      | +977 (+0.6%)        | +948 (+0.6%)                        | +1,487 (+0.9%)                                       | +1,169 (+0.7%)      |
| Total CRC diagnoses                            | 2020       | 21,721        | -554 (-2.6%)      | -865 (-4.0%)      | -1,368 (-6.3%)      | -1,447 (-6.7%)                      | -1,551 (-7.1%)                                       | -1,628 (-7.5%)      |
|                                                | 2021       | 21,970        | +180 (+0.8%)      | +269 (+1.2%)      | +268 (+1.2%)        | +275 (+1.3%)                        | -471 (-2.1%)                                         | +124 (+0.6%)        |
|                                                | 2022       | 22,295        | +265 (+1.2%)      | +475 (+2.1%)      | -667 (-3.0%)        | +808 (+3.6%)                        | +426 (+1.9%)                                         | +994 (+4.5%)        |
|                                                | 2023       | 22,295        | +242 (+1.1%)      | +452 (+2.0%)      | -689 (-3.1%)        | +785 (+3.5%)                        | +403 (+1.8%)                                         | +994 (+4.5%)        |
|                                                | 2024       | 22,295        | +242 (+1.1%)      | +452 (+2.0%)      | -689 (-3.1%)        | +808 (+3.6%)                        | +426 (+1.9%)                                         | +994 (+4.5%)        |
|                                                | 2020-2050  | 841,511       | +1,023 (+0.1%)    | +1,682 (+0.2%)    | +3,306 (+0.4%)      | +3,144 (+0.4%)                      | +5,140 (+0.6%)                                       | +3,999 (+0.5%)      |
| CRC deaths                                     | 2020-2050  | 311,133       | +491 (+0.2%)      | +789 (+0.3%)      | +1,502 (+0.5%)      | +1,465 (+0.5%)                      | +2,295 (+0.7%)                                       | +1,833 (+0.6%)      |
| LYs lost                                       | 2020-2050  | -             | 5,247             | 8,629             | 1,940               | 16,238                              | 8,866                                                | 20,273              |

Abbreviations: CRC, Colorectal Cancer; LYs, Life Years.

## References

1. Toes-Zoutendijk E, van Leerdam ME, Dekker E, et al. Real-Time Monitoring of Results During First Year of Dutch Colorectal Cancer Screening Program and Optimization by Altering Fecal Immunochemical Test Cut-Off Levels. *Gastroenterology* 2017; **152**(4): 767-75 e2.
2. Kooyker AI, Toes-Zoutendijk E, Opstal-van Winden AWJ, et al. The second round of the Dutch colorectal cancer screening program: Impact of an increased fecal immunochemical test cut-off level on yield of screening. *Int J Cancer* 2020; **147**(4): 1098-106.
3. van Rijn JC, Reitsma JB, Stoker J, Bossuyt PM, van Deventer SJ, Dekker E. Polyp miss rate determined by tandem colonoscopy: a systematic review. *Am J Gastroenterol* 2006; **101**(2): 343-50.
4. Pickhardt PJ, Hassan C, Halligan S, Marmo R. Colorectal cancer: CT colonography and colonoscopy for detection—systematic review and meta-analysis. *Radiology* 2011; **259**(2): 393-405.
